# Supplementary material for: Amyloid-linked versus age-driven copathologies in Alzheimer’s dementia: differential associations with APOE ε4
Source: Research Square preprint supplement (doi:10.21203/rs.3.rs-9044264/v1), 2026-03-16
Supplement: Supplementary file 1 [file 9a8726c3187d274ff750dbca.docx]

**SUPPLEMENTARY MATERIAL FOR:**

**Amyloid-linked versus age-driven copathologies in Alzheimer’s dementia: differential associations with *APOE* ε4**

**SUPPLEMENTARY METHODS**

**Statistical Analyses**

**General Approach**

The general statistical approach, including variable summarization, regression modeling strategies, adjustment levels, and *APOE* grouping rationale, is described in the main text (Section 4.5). All analyses were performed using R (version 4.2.2) with two-sided tests and p-value < 0.05 considered statistically significant.

**Cohort Characterization and Amyloid-Positive Selection Rationale**

We characterized the cohort by examining distributions of cognitive status, clinical diagnoses, and amyloid pathology across *APOE* haplotypes and age groups (Supplementary Figure 1A-B). Binary logistic regression models assessed associations between *APOE* haplotype (with ε3/ε3 as reference) and: (1) clinical diagnosis of AD versus non-AD, (2) amyloid positivity at autopsy (moderate or frequent neuritic plaques). Unadjusted results were visualized as forest plots (Supplementary Figure 1C; Supplementary Table 1A-B). For the concordant clinicopathological AD outcome, models were fit across three adjustment levels: unadjusted, adjusted for sex and education, and adjusted for sex, education, and age at dementia diagnosis, with odds ratios and 95% confidence intervals reported (Supplementary Table 2).

**Braak Neurofibrillary Tangle Stage Analyses**

We examined the association between age (as a continuous variable per 10-year increase) and ordinal Braak stage using proportional odds regression, adjusted for sex and education, within each *APOE* haplotype and diagnostic stratum (Supplementary Table 3). Visual representations of Braak stage distributions by age are shown in Supplementary Figure 2.

**APOE × Age Interaction Testing for Copathologies**

For regional Lewy body pathology, regional TDP-43 pathology, and vascular pathologies, we tested whether age effects on pathology prevalence or severity differed by APOE haplotype. Models included an *APOE* × age interaction term, and the interaction was formally tested using likelihood ratio tests. Test statistics (LR χ²) and p-values are reported in Supplementary Figures 3, 4, and 5.

**Sex-Stratified Sensitivity Analyses**

For each pathology and *APOE* haplotype combination, we first examined unadjusted distributions using chi-squared tests (or Fisher's exact test when cell counts were <5). We then fitted regression models comparing males versus females adjusted for age at death, education, and ADNC. For pathologies with ordered severity levels, we used proportional odds ordinal regression. When ordinal models failed to converge, the outcome was dichotomized at the median and analyzed using binary logistic regression. Odds ratios with 95% CIs were estimated for the male versus female comparison (Supplementary Table 10).

**TDP-43 Pathology Across Diagnostic Groups**

To examine whether *APOE* haplotype associations with TDP-43 pathology differed by diagnostic specificity, we fitted binary logistic regression models across three progressively restricted diagnostic strata: all-cause dementia, AD dementia (clinical diagnosis), and amyloid-positive AD dementia. For each stratum, models were fit at three adjustment levels: (1) unadjusted, (2) adjusted for sex, education, and age at death, and (3) additionally adjusted for ADNC stage. The reference group was ε3/ε3 carriers. Chi-squared statistics for unadjusted analyses and likelihood ratio χ² statistics for adjusted models are reported alongside odds ratios with 95% confidence intervals and p-values (Supplementary Table 11).

**SUPPLEMENTARY RESULTS**


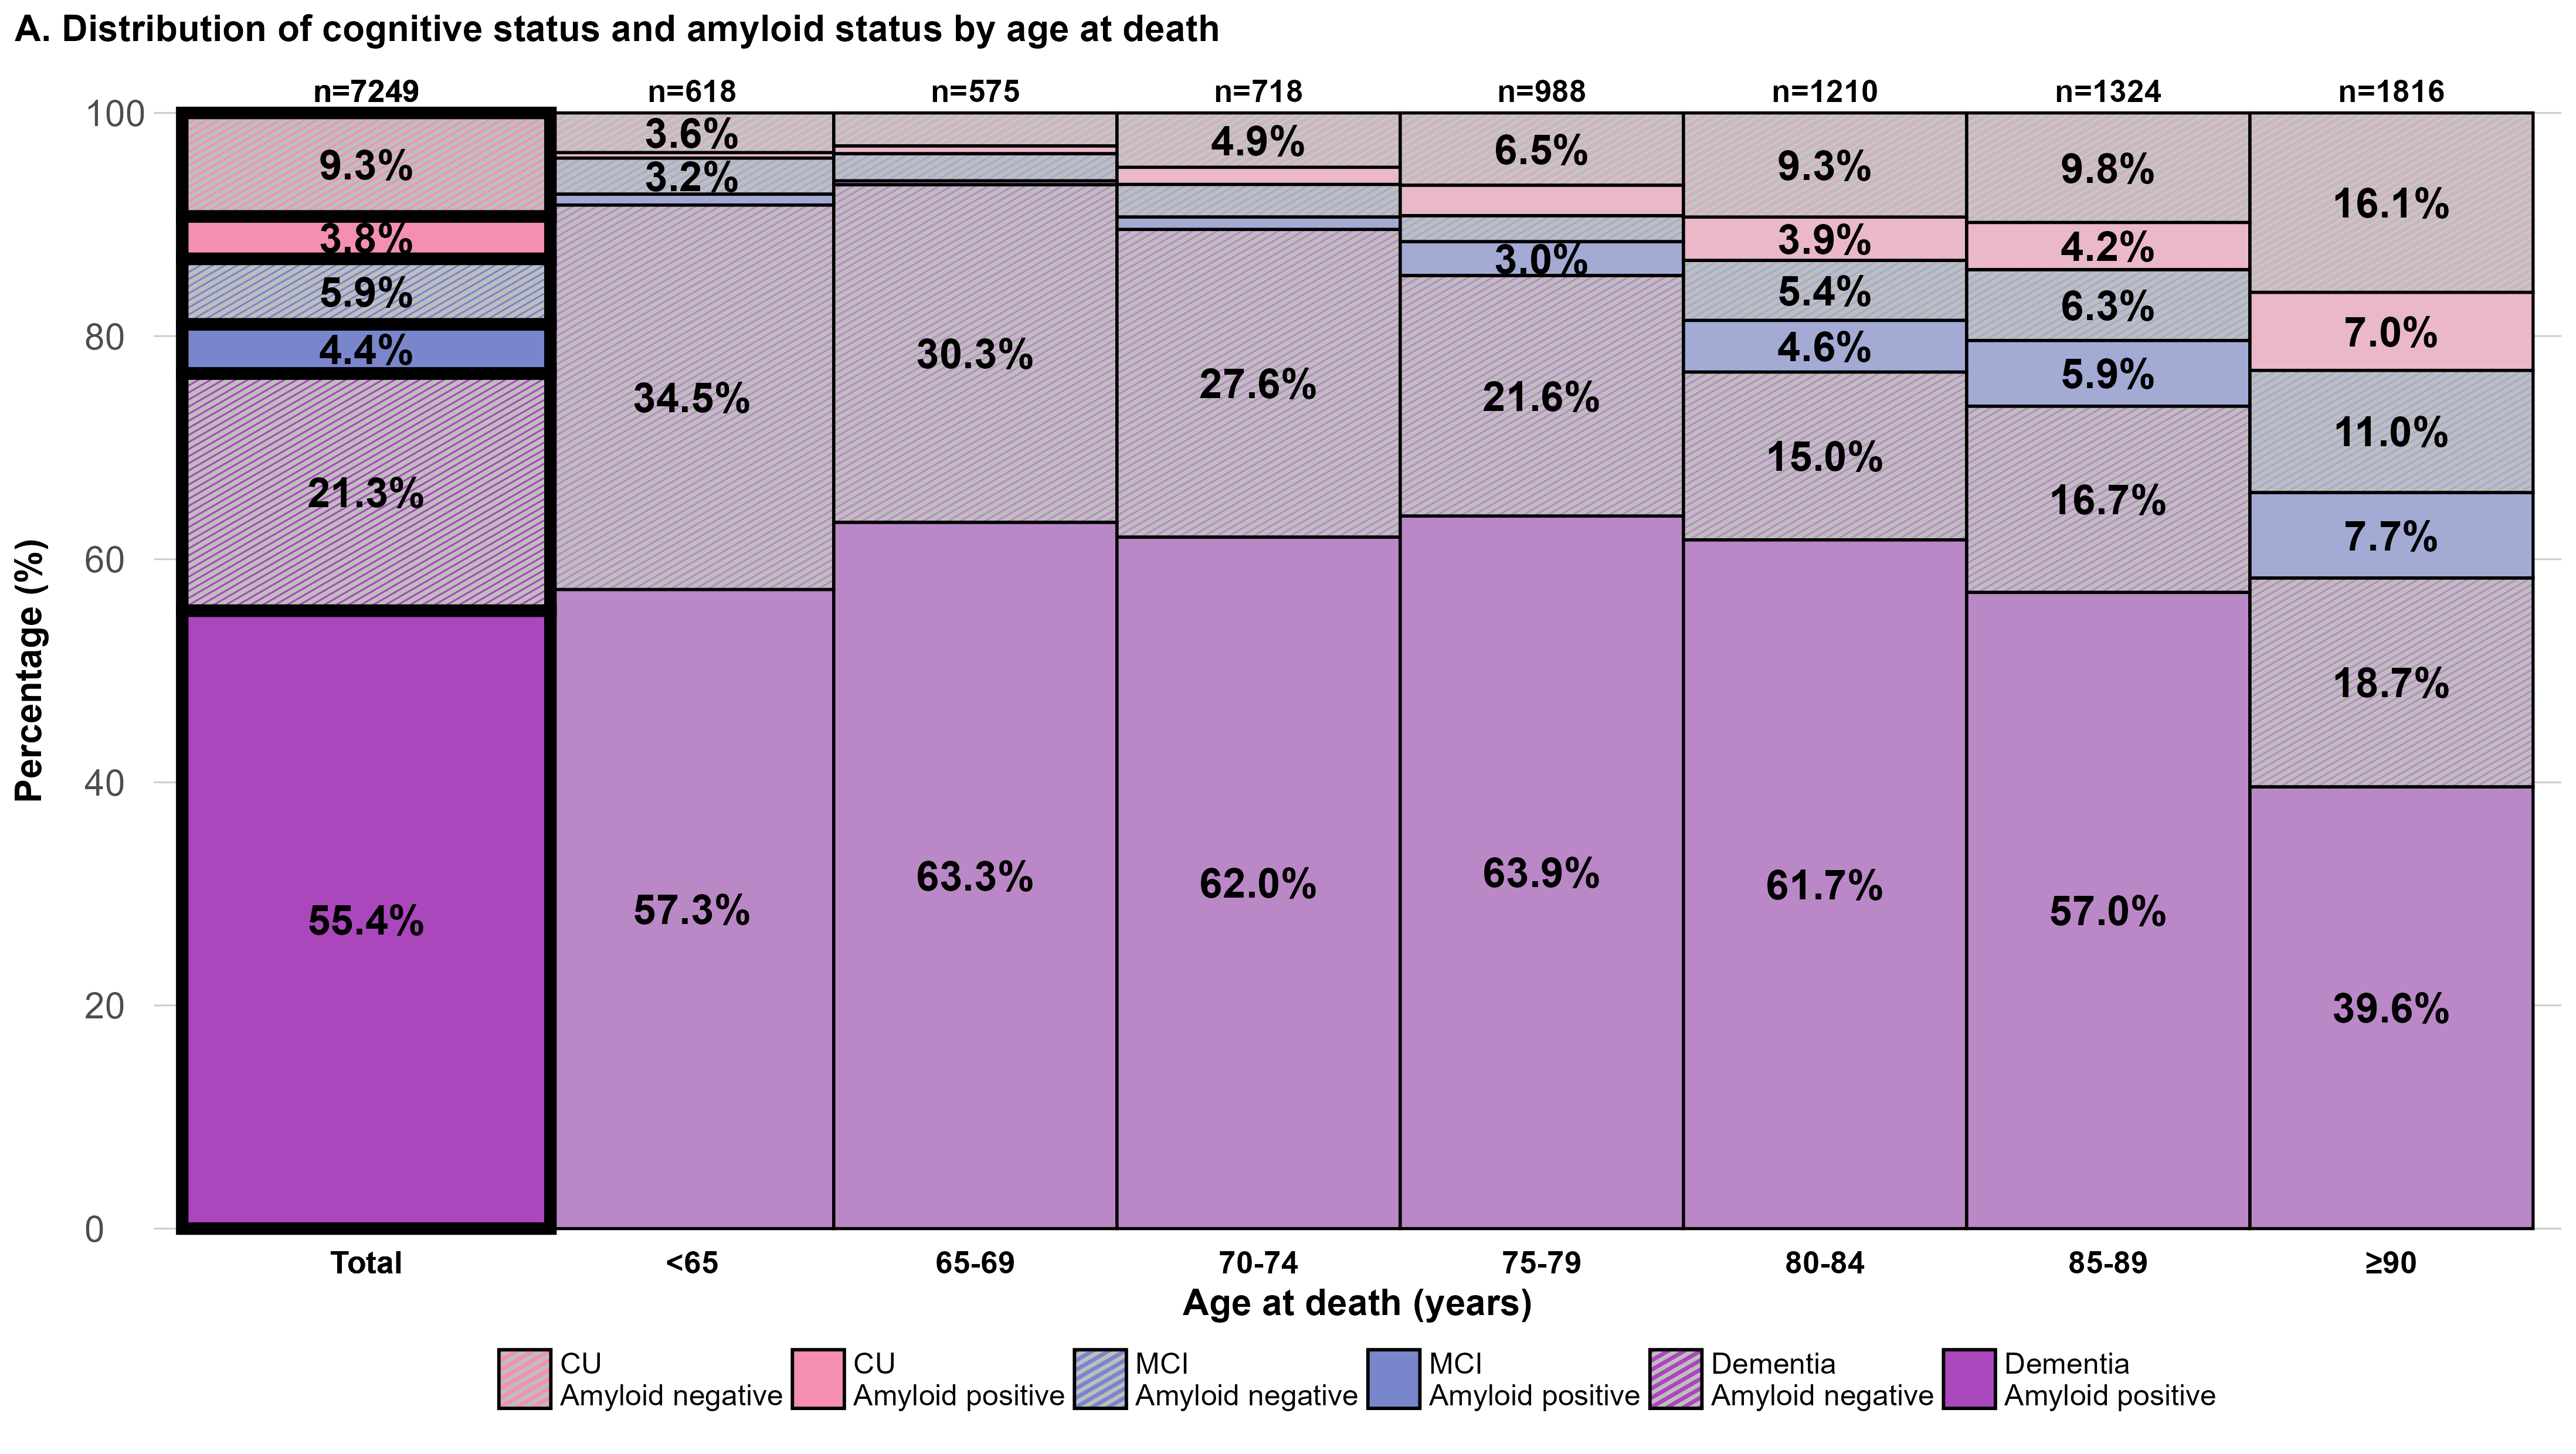

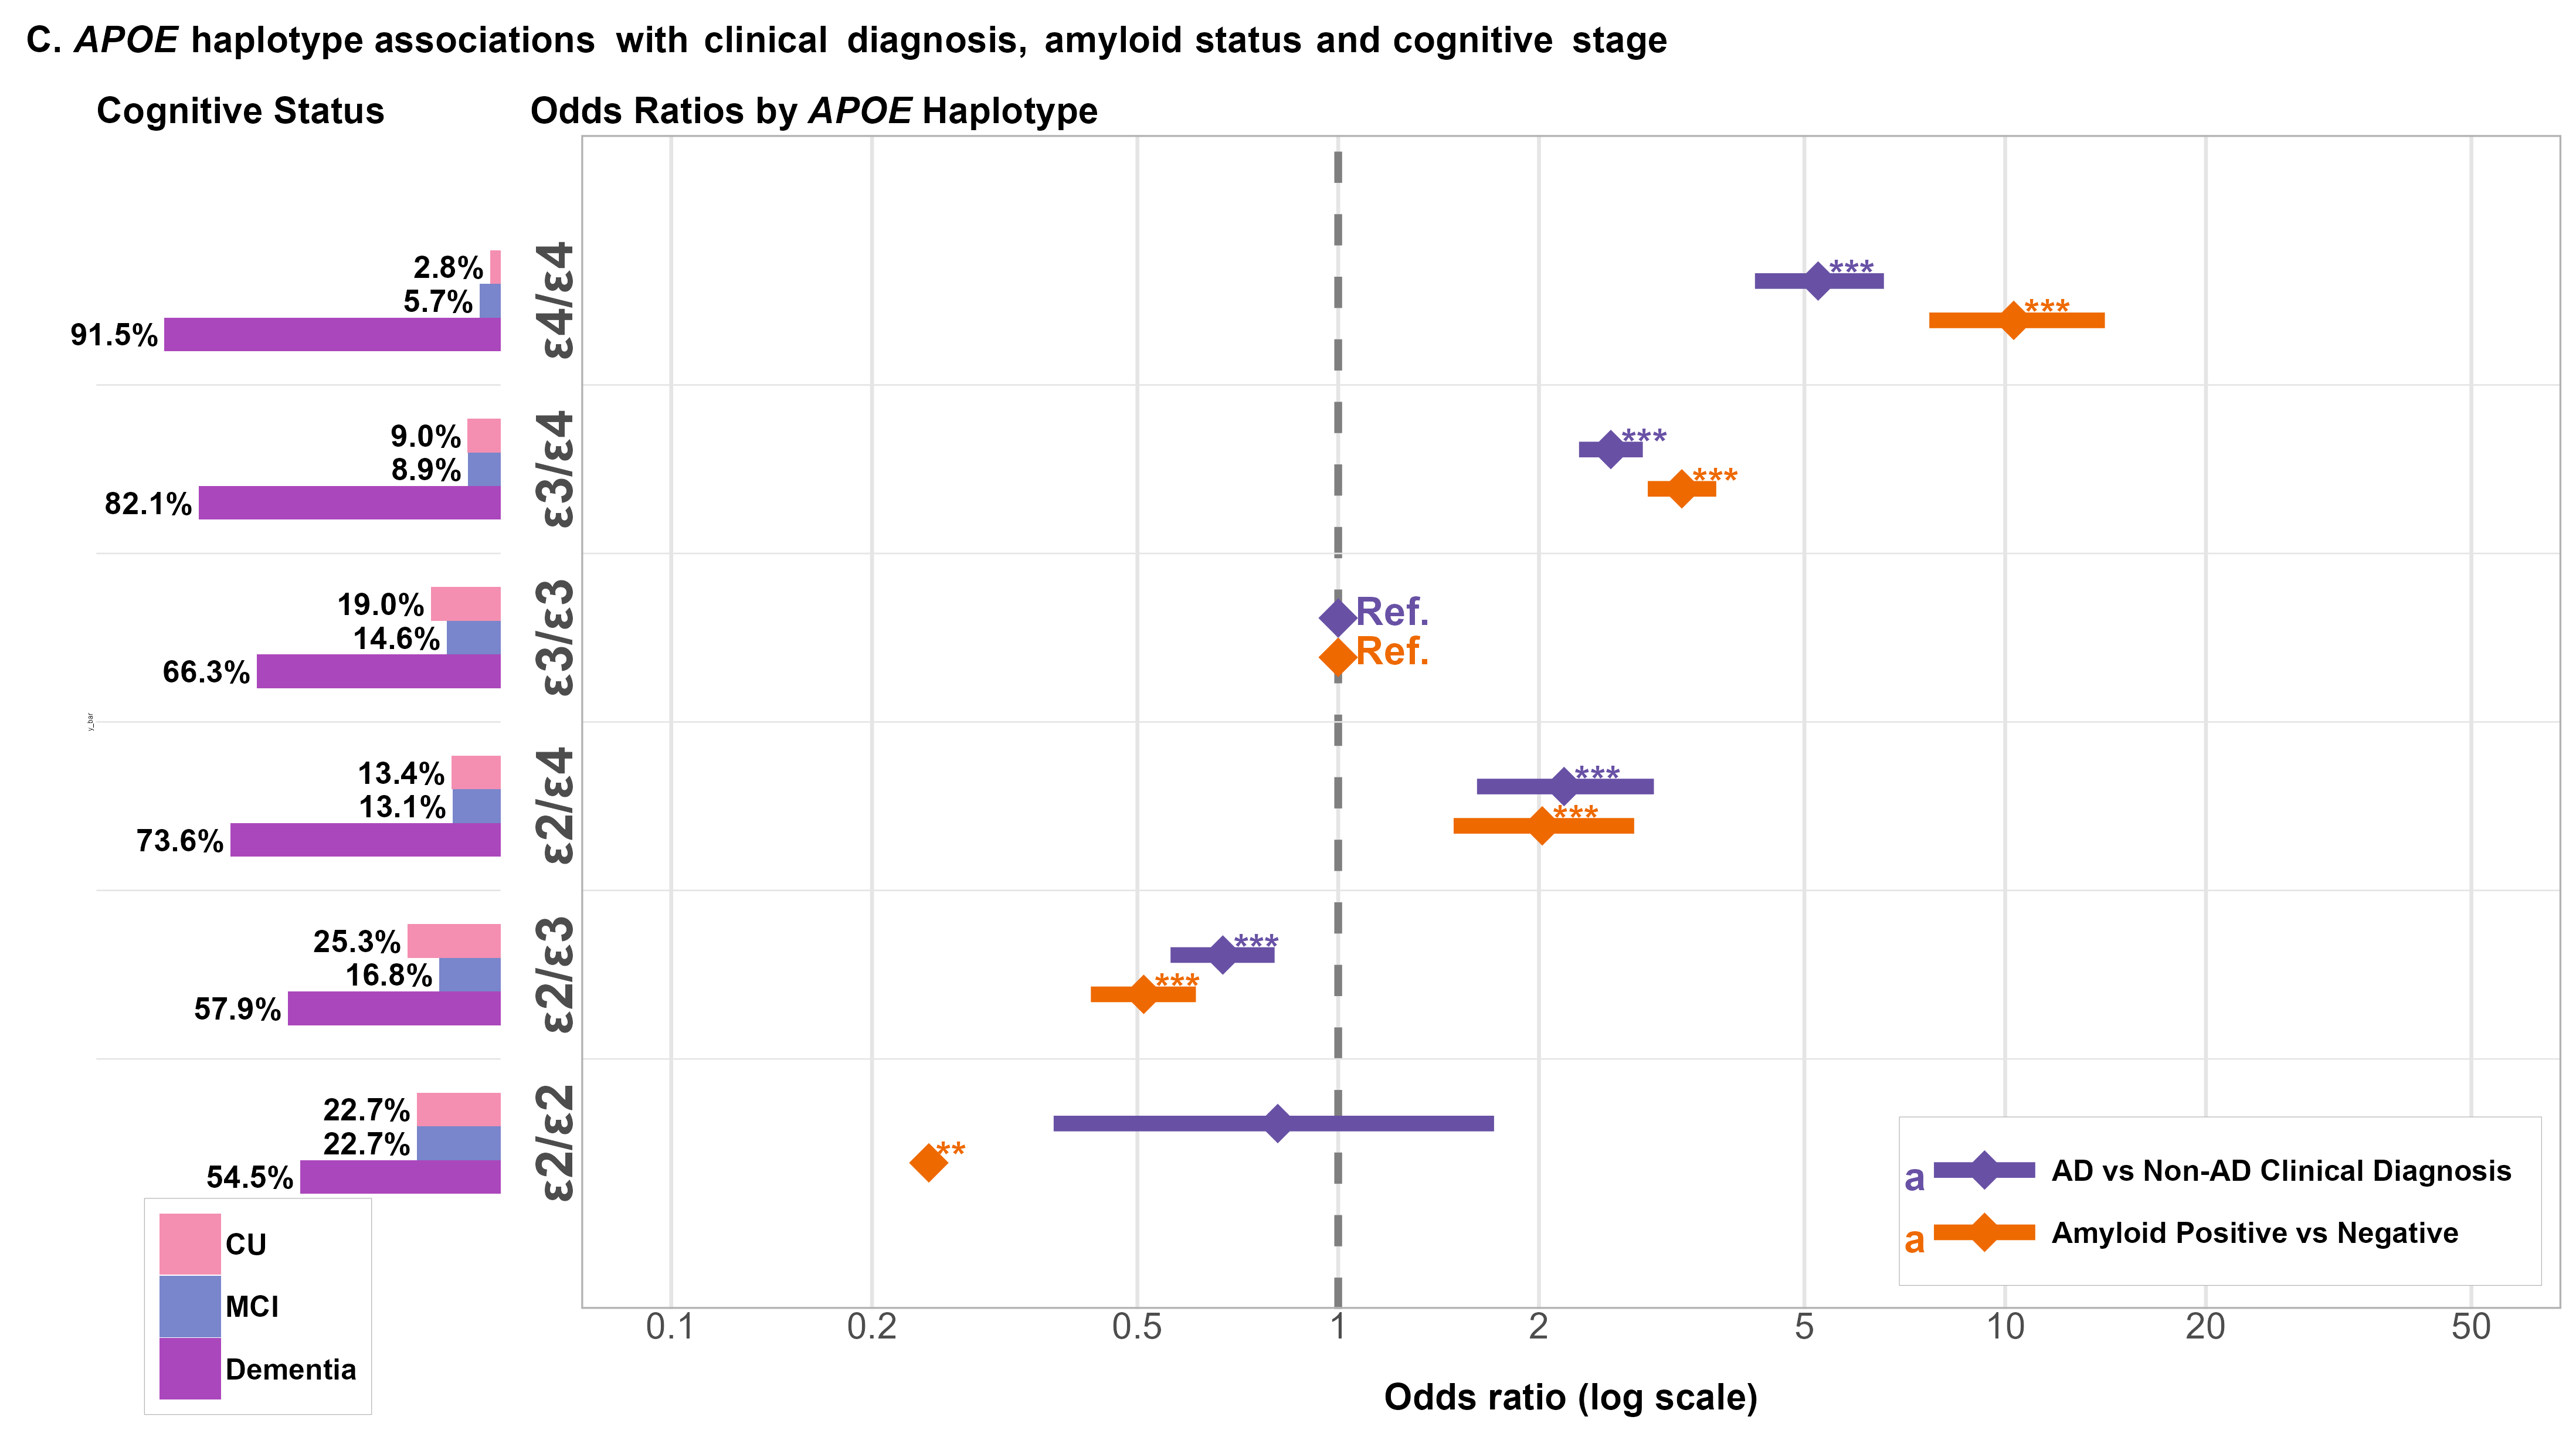

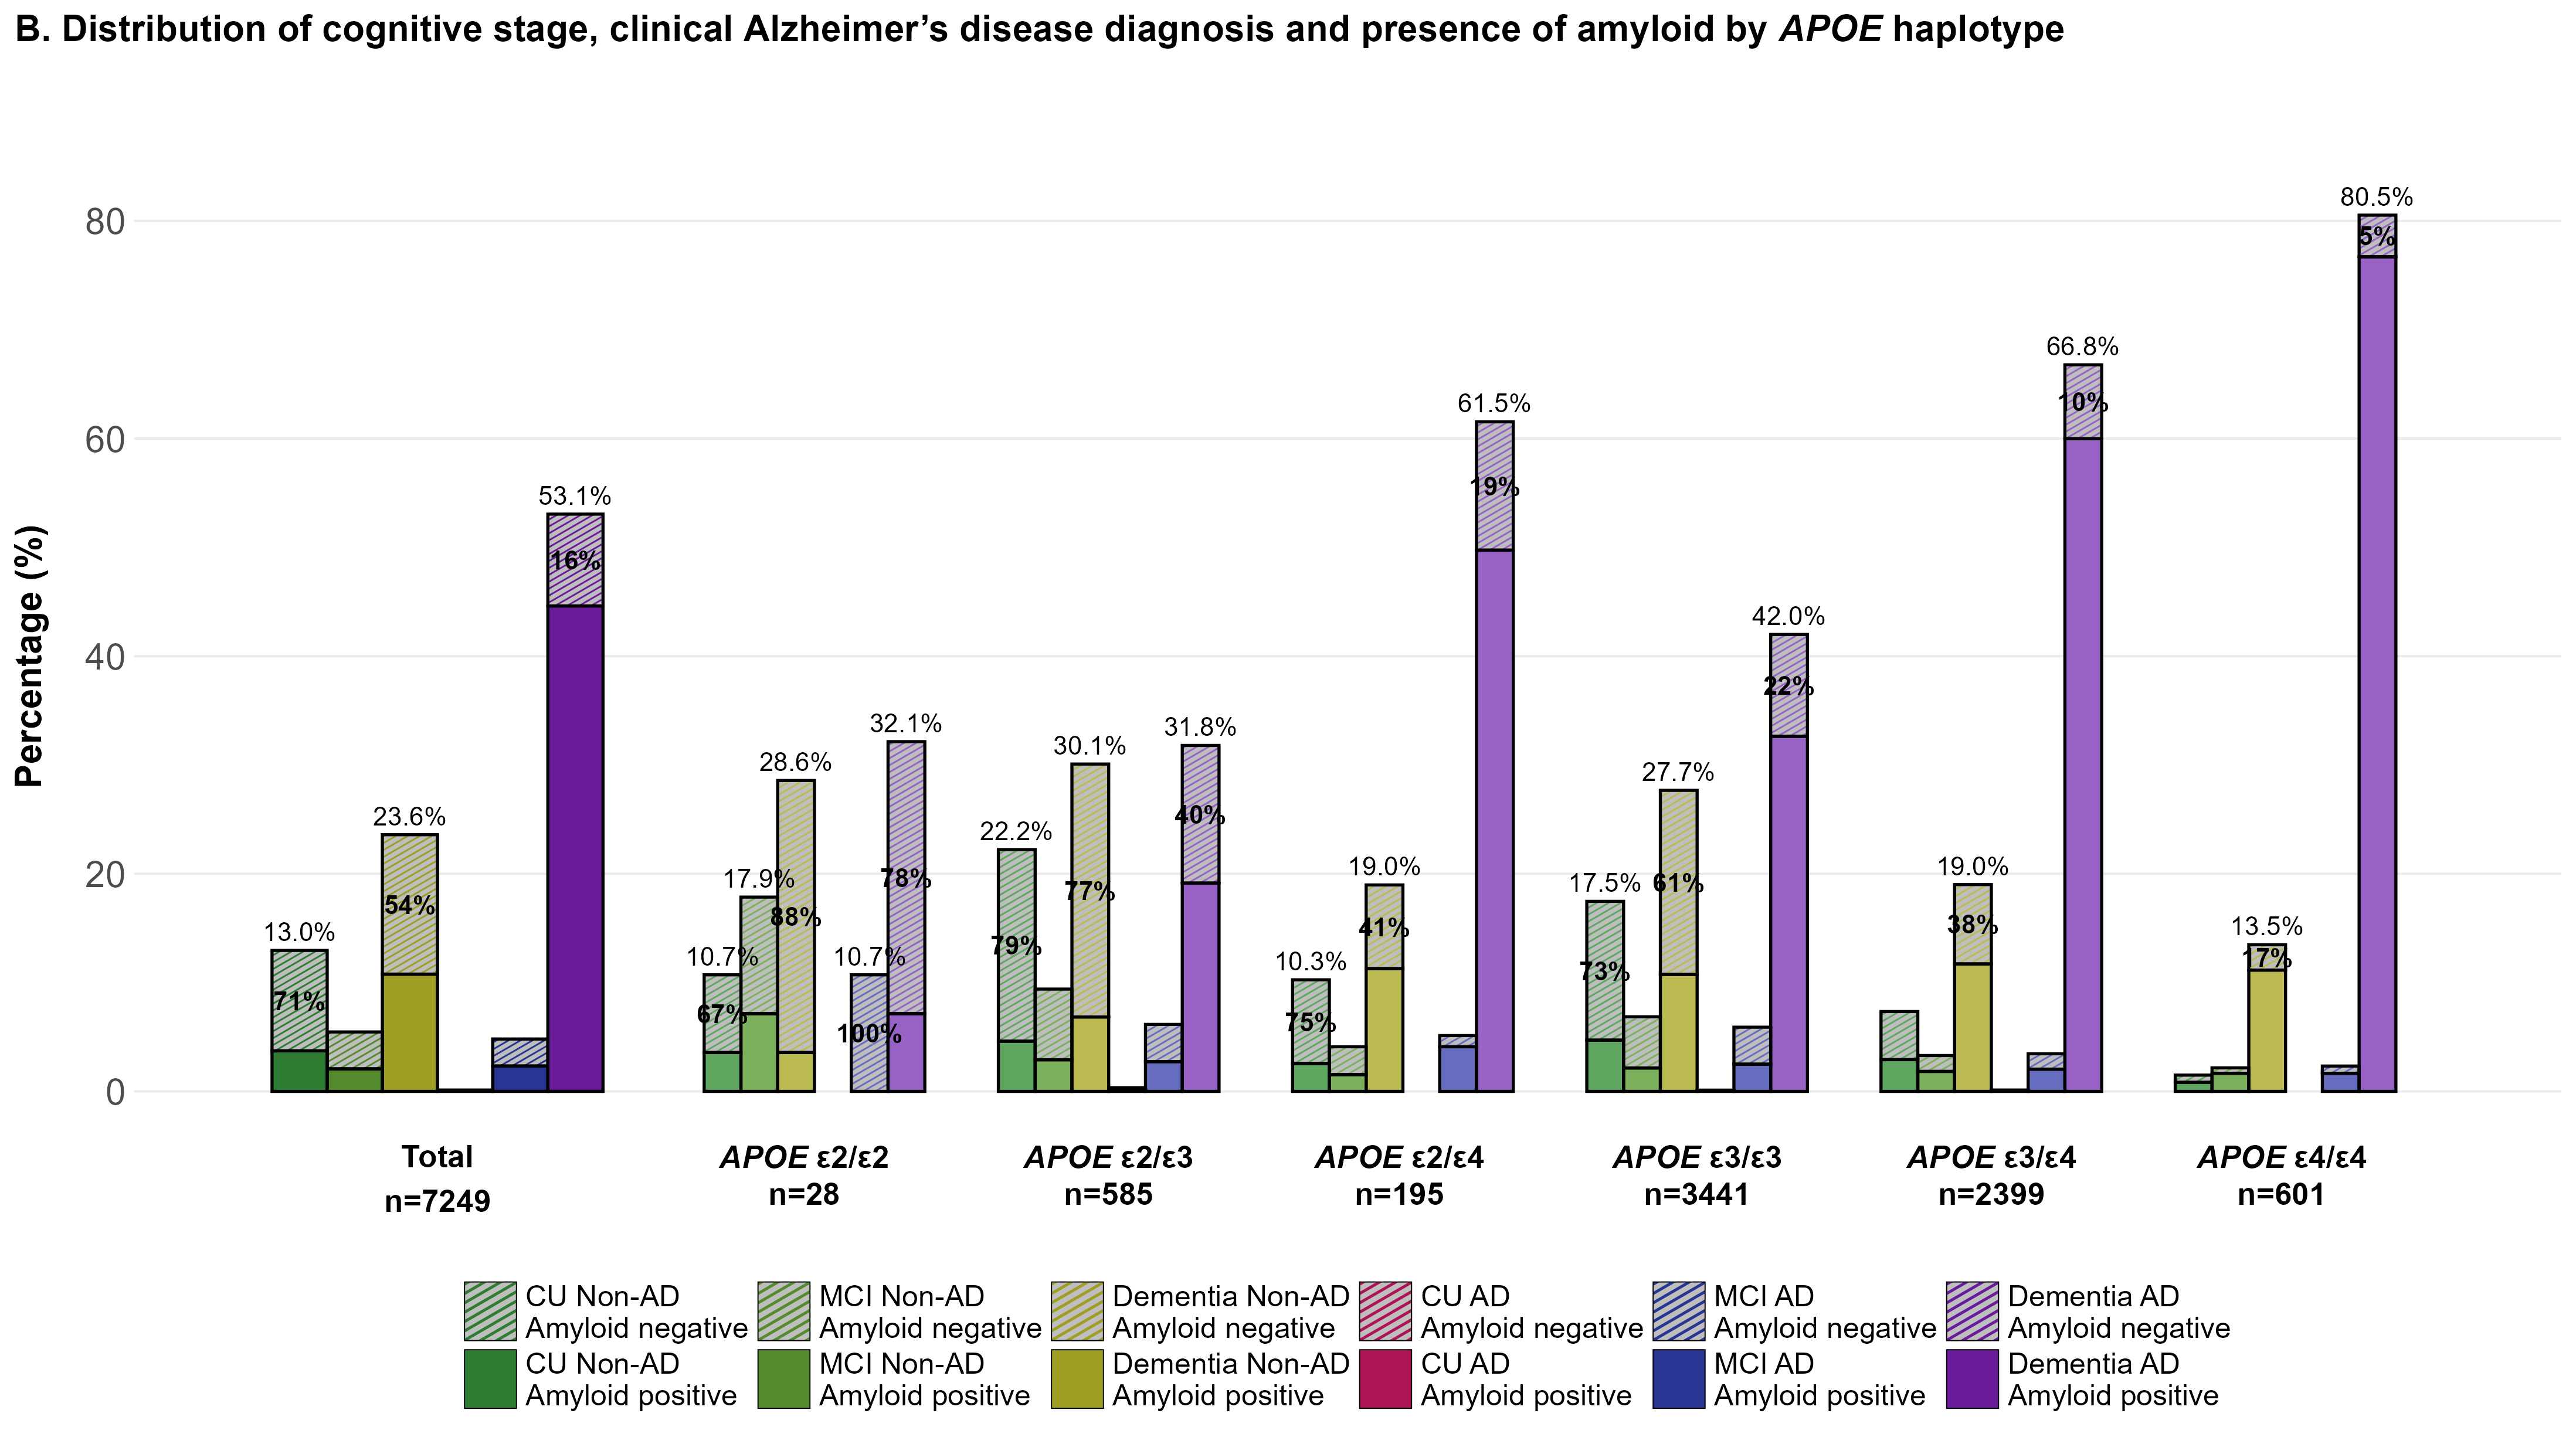


**Supplementary Figure 1. Cognitive, clinical, and amyloid status by *APOE* haplotype and age.** (A) Distribution of cognitive/clinical status at death within each *APOE* haplotype (and total cohort): cognitively unimpaired, MCI or dementia, each classified as primary AD or primary non-AD; striped segments indicate amyloid-negative and solid segments amyloid-positive cases. Labels show total percentage per bar and, when ≥10% of the *APOE* group, the proportion that is amyloid-negative. (B) Distribution of cognitive status by age-at-death group and amyloid status (leftmost bar: total cohort), with striped vs solid segments indicating amyloid-negative vs amyloid-positive, respectively; percentage labels are shown for categories ≥3% of the corresponding age group. The total number of individuals for each haplotype group is shown. (C) Odds ratios (log scale) for diagnosis of AD vs non-AD clinical etiology and amyloid positivity, across *APOE* haplotypes (reference: *APOE* ε3/ε3). Points indicate odds ratios and horizontal lines 95% CIs; asterisks denote *p < 0.05, **p < 0.01, ***p < 0.001. Abbreviations: AD, Alzheimer’s disease; *APOE*, apolipoprotein E; CI, confidence interval; MCI, mild cognitive impairment; CU, cognitively unimpaired; Ref., Reference.

**
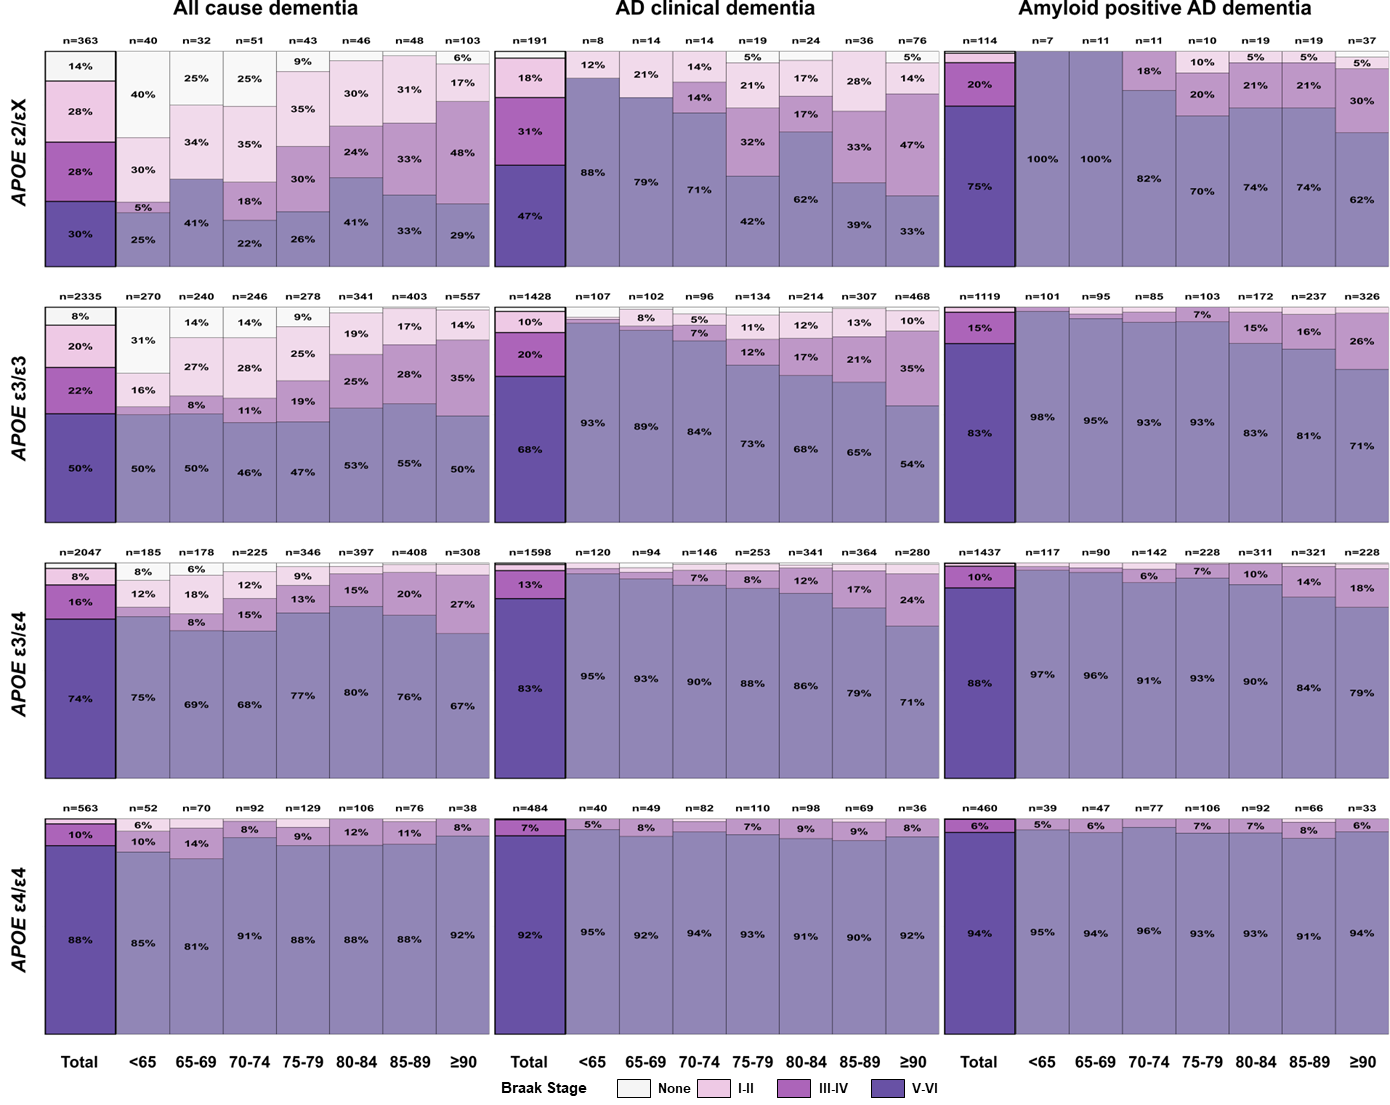
Supplementary Figure 2. Distribution of Braak neurofibrillary tangle stages by age at death and *APOE* haplotype in dementia cases.** Stacked bar charts show the proportion of individuals with no, I–II, III–IV, and V–VI Braak stages across age-at-death categories for ε2/εX ε3/ε3, ε3/ε4 and ε4/ε4 carriers who died with dementia of any cause (left panels), with a clinical diagnosis of AD dementia (middle panels), or with AD dementia and neuritic-plaque–confirmed amyloid positivity (right panels). For each bar, the total number of individuals in that age and haplotype stratum is shown above, and the thick black outline indicates the total (all ages combined) within each diagnostic stratum. AD, Alzheimer's disease; APOE, apolipoprotein E.


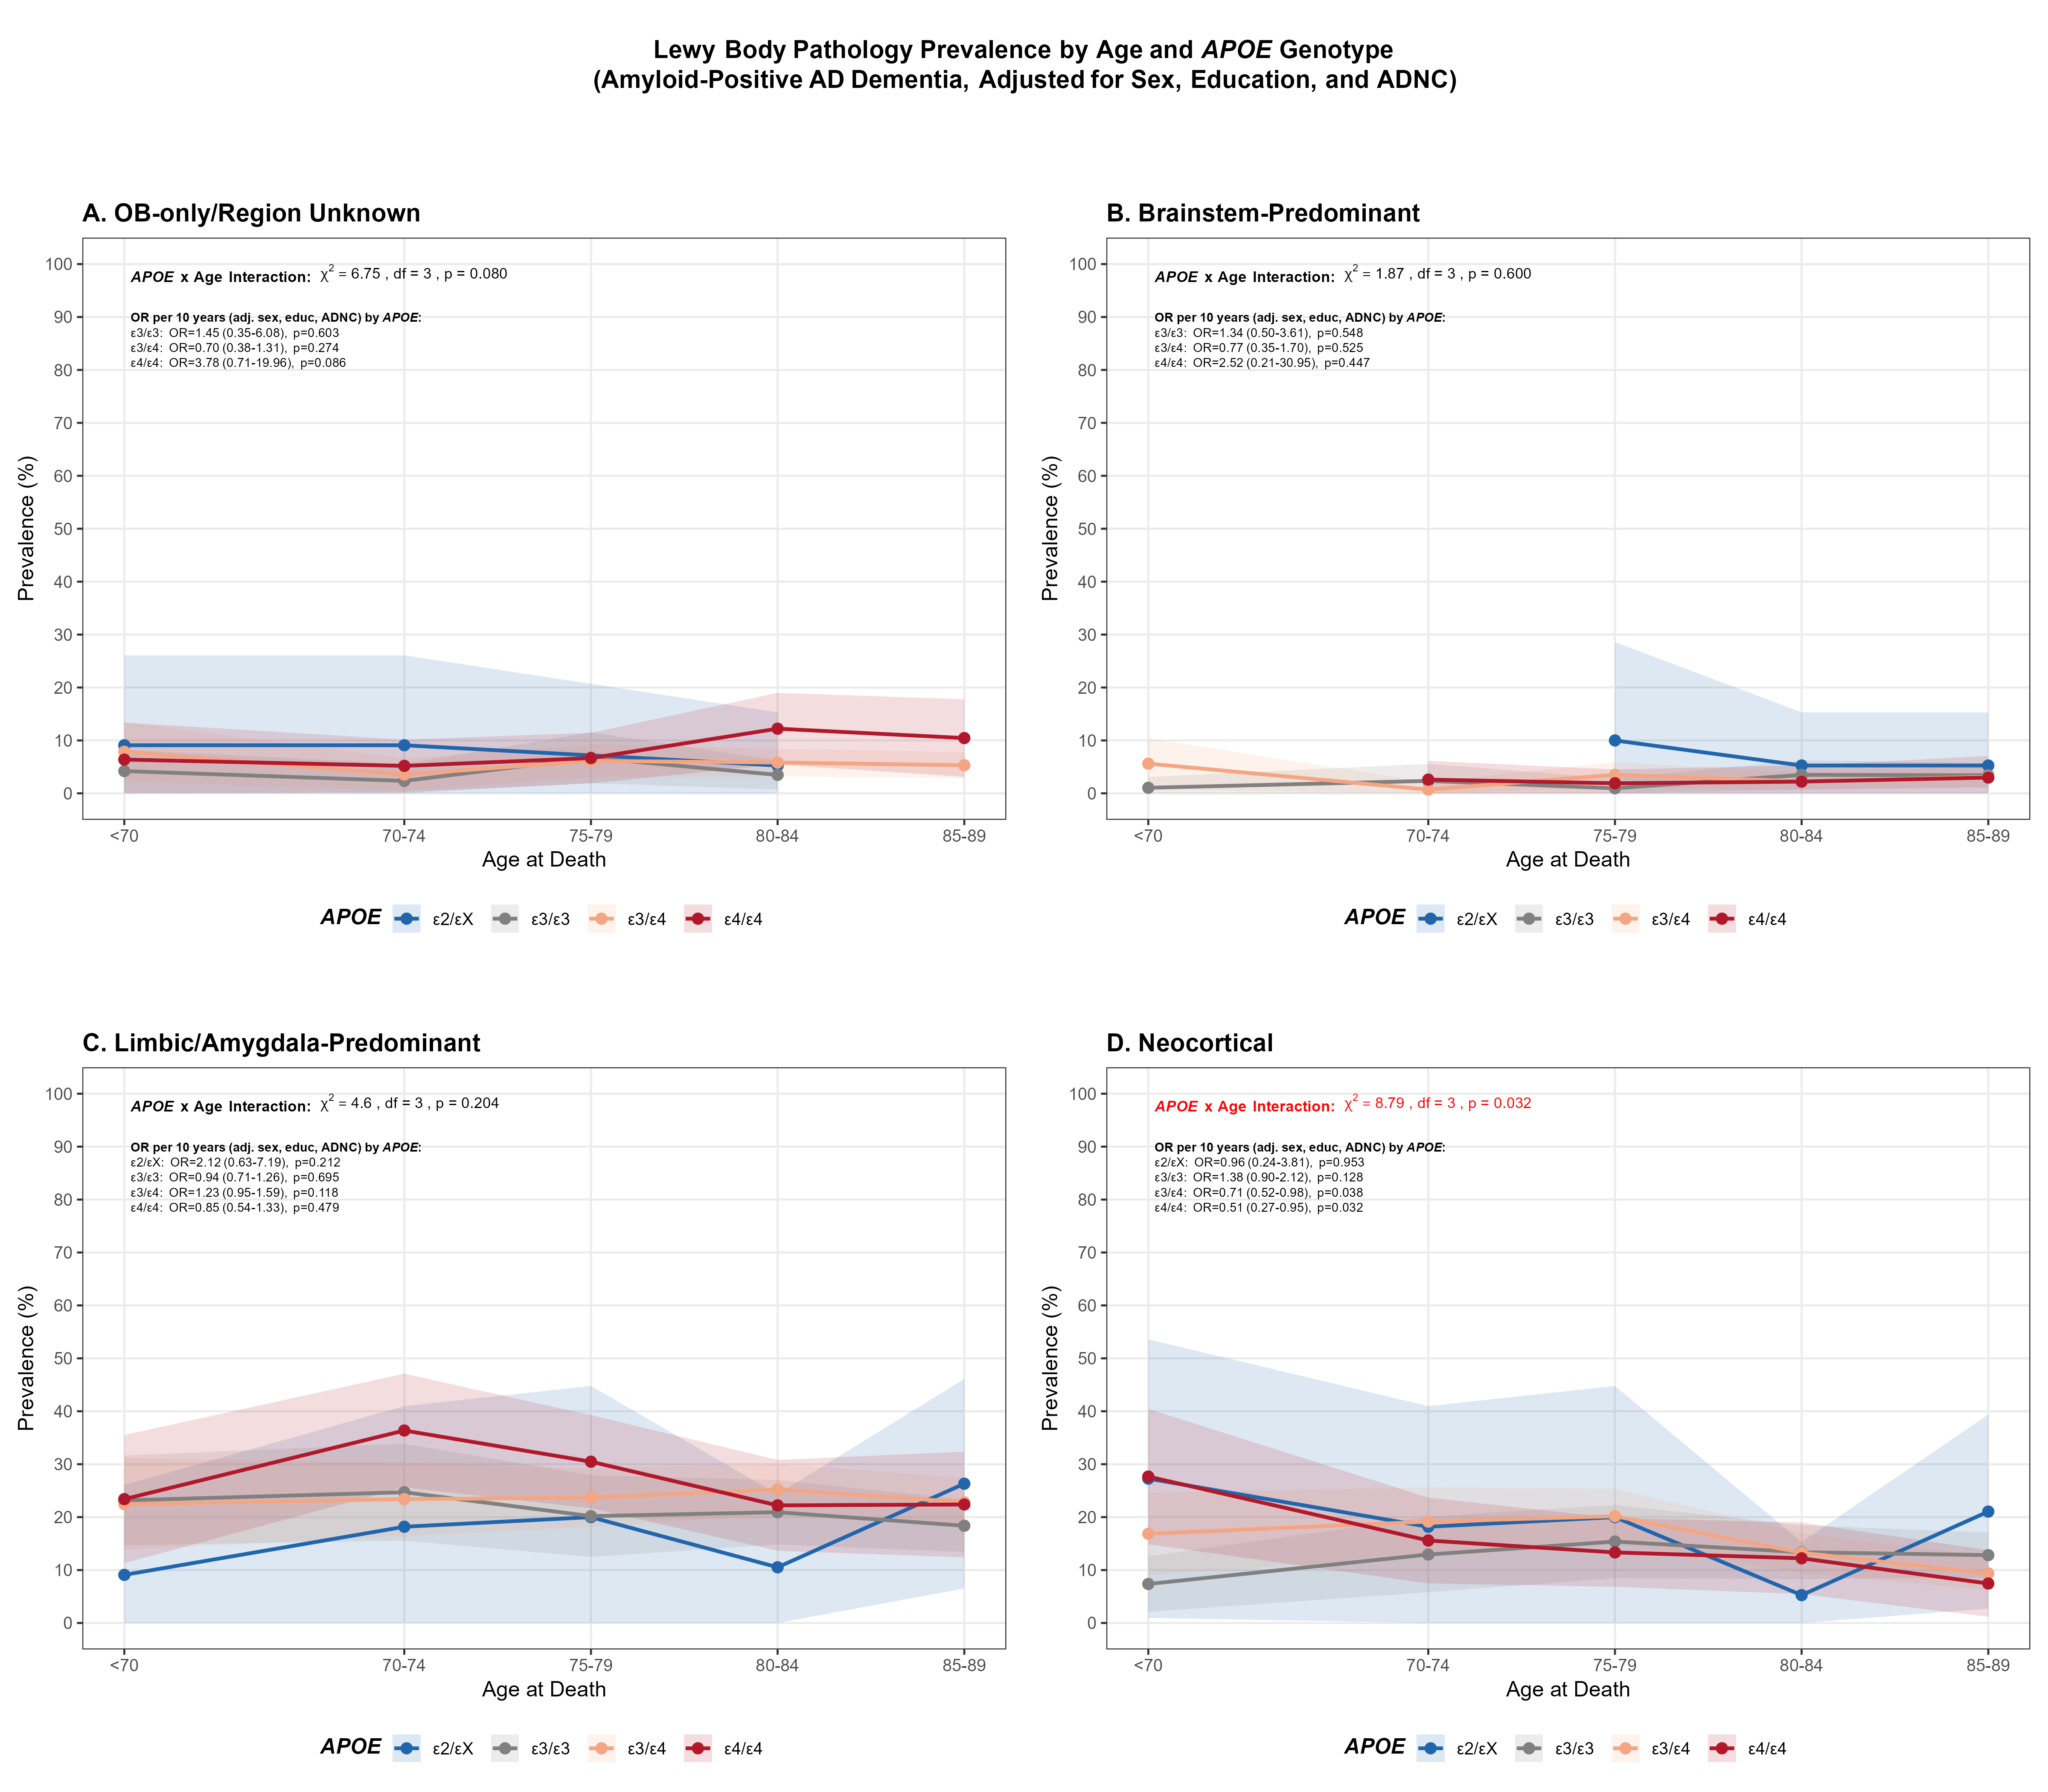


**Supplementary Figure 3. Lewy Body pathology prevalence by age at death and *APOE* haplotype in amyloid-positive Alzheimer’s disease dementia.** Line plots show the prevalence (%) of Lewy body pathology across age-at-death categories, stratified by APOE haplotype, for four regional patterns: (A) olfactory bulb–only/region unknown, (B) brainstem-predominant, (C) limbic/amygdala-predominant, and (D) neocortical. Shaded areas represent 95% confidence intervals. Odds ratios are estimated per 10-year increase in age using models adjusted for sex, education, and ADNC. *APOE* × age interaction terms were tested for each regional pattern, with corresponding χ² statistics and p-values shown in each panel. Interaction labels shown in red indicate statistical significance (p < 0.05). AD, Alzheimer's disease; ADNC, Alzheimer's disease neuropathologic change; *APOE*, apolipoprotein E; educ, education; OB, olfactory bulb; OR, odds ratio.

**
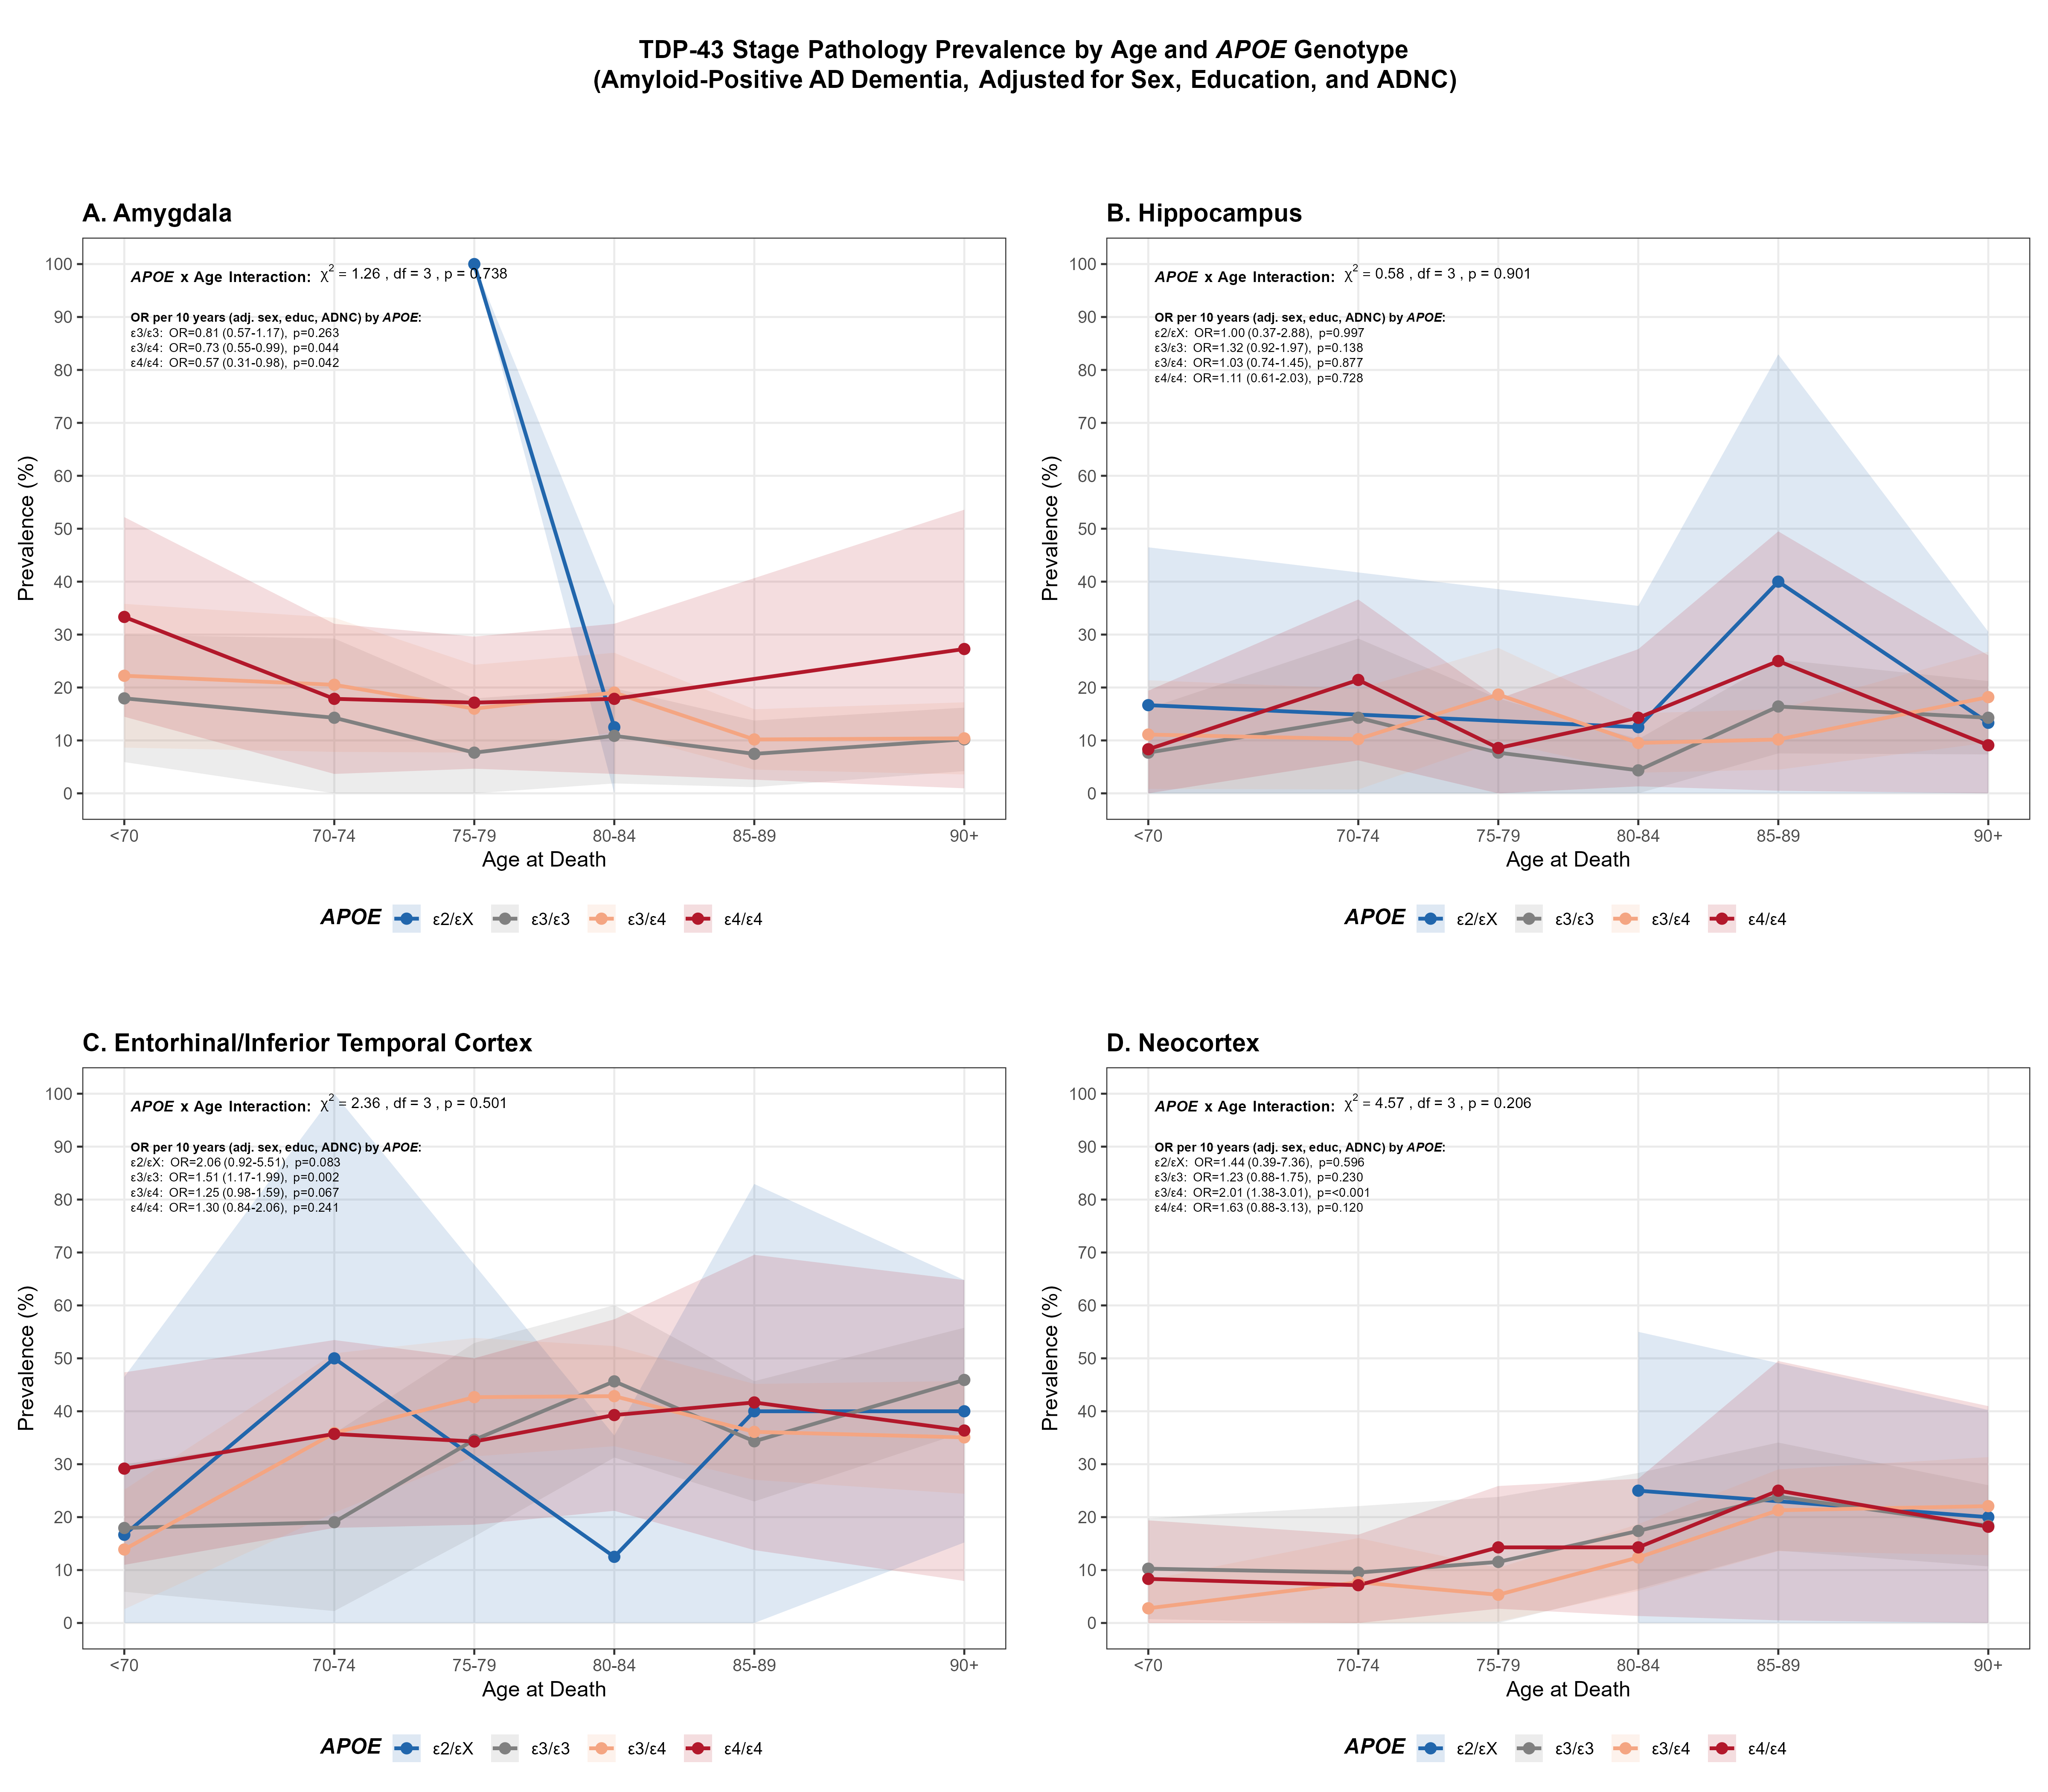
**

**Supplementary Figure 4. TDP-43 pathology prevalence by age at death and *APOE* haplotype in amyloid-positive Alzheimer’s disease dementia.** Line plots show the prevalence (%) of TDP-43 pathology across age-at-death categories, stratified by *APOE* haplotype, for four brain regions: (A) amygdala, (B) hippocampus, (C) entorhinal/inferior temporal cortex, and (D) neocortex. Shaded areas represent 95% confidence intervals. Odds ratios are estimated per 10-year increase in age using models adjusted for sex, education, and ADNC. *APOE* × age interaction terms were tested for each region, with corresponding χ² statistics and p-values shown in each panel. AD, Alzheimer's disease; ADNC, Alzheimer's disease neuropathologic change; *APOE*, apolipoprotein E; educ, education; OB, olfactory bulb; OR, odds ratio; TDP-43, TAR DNA-binding protein 43.


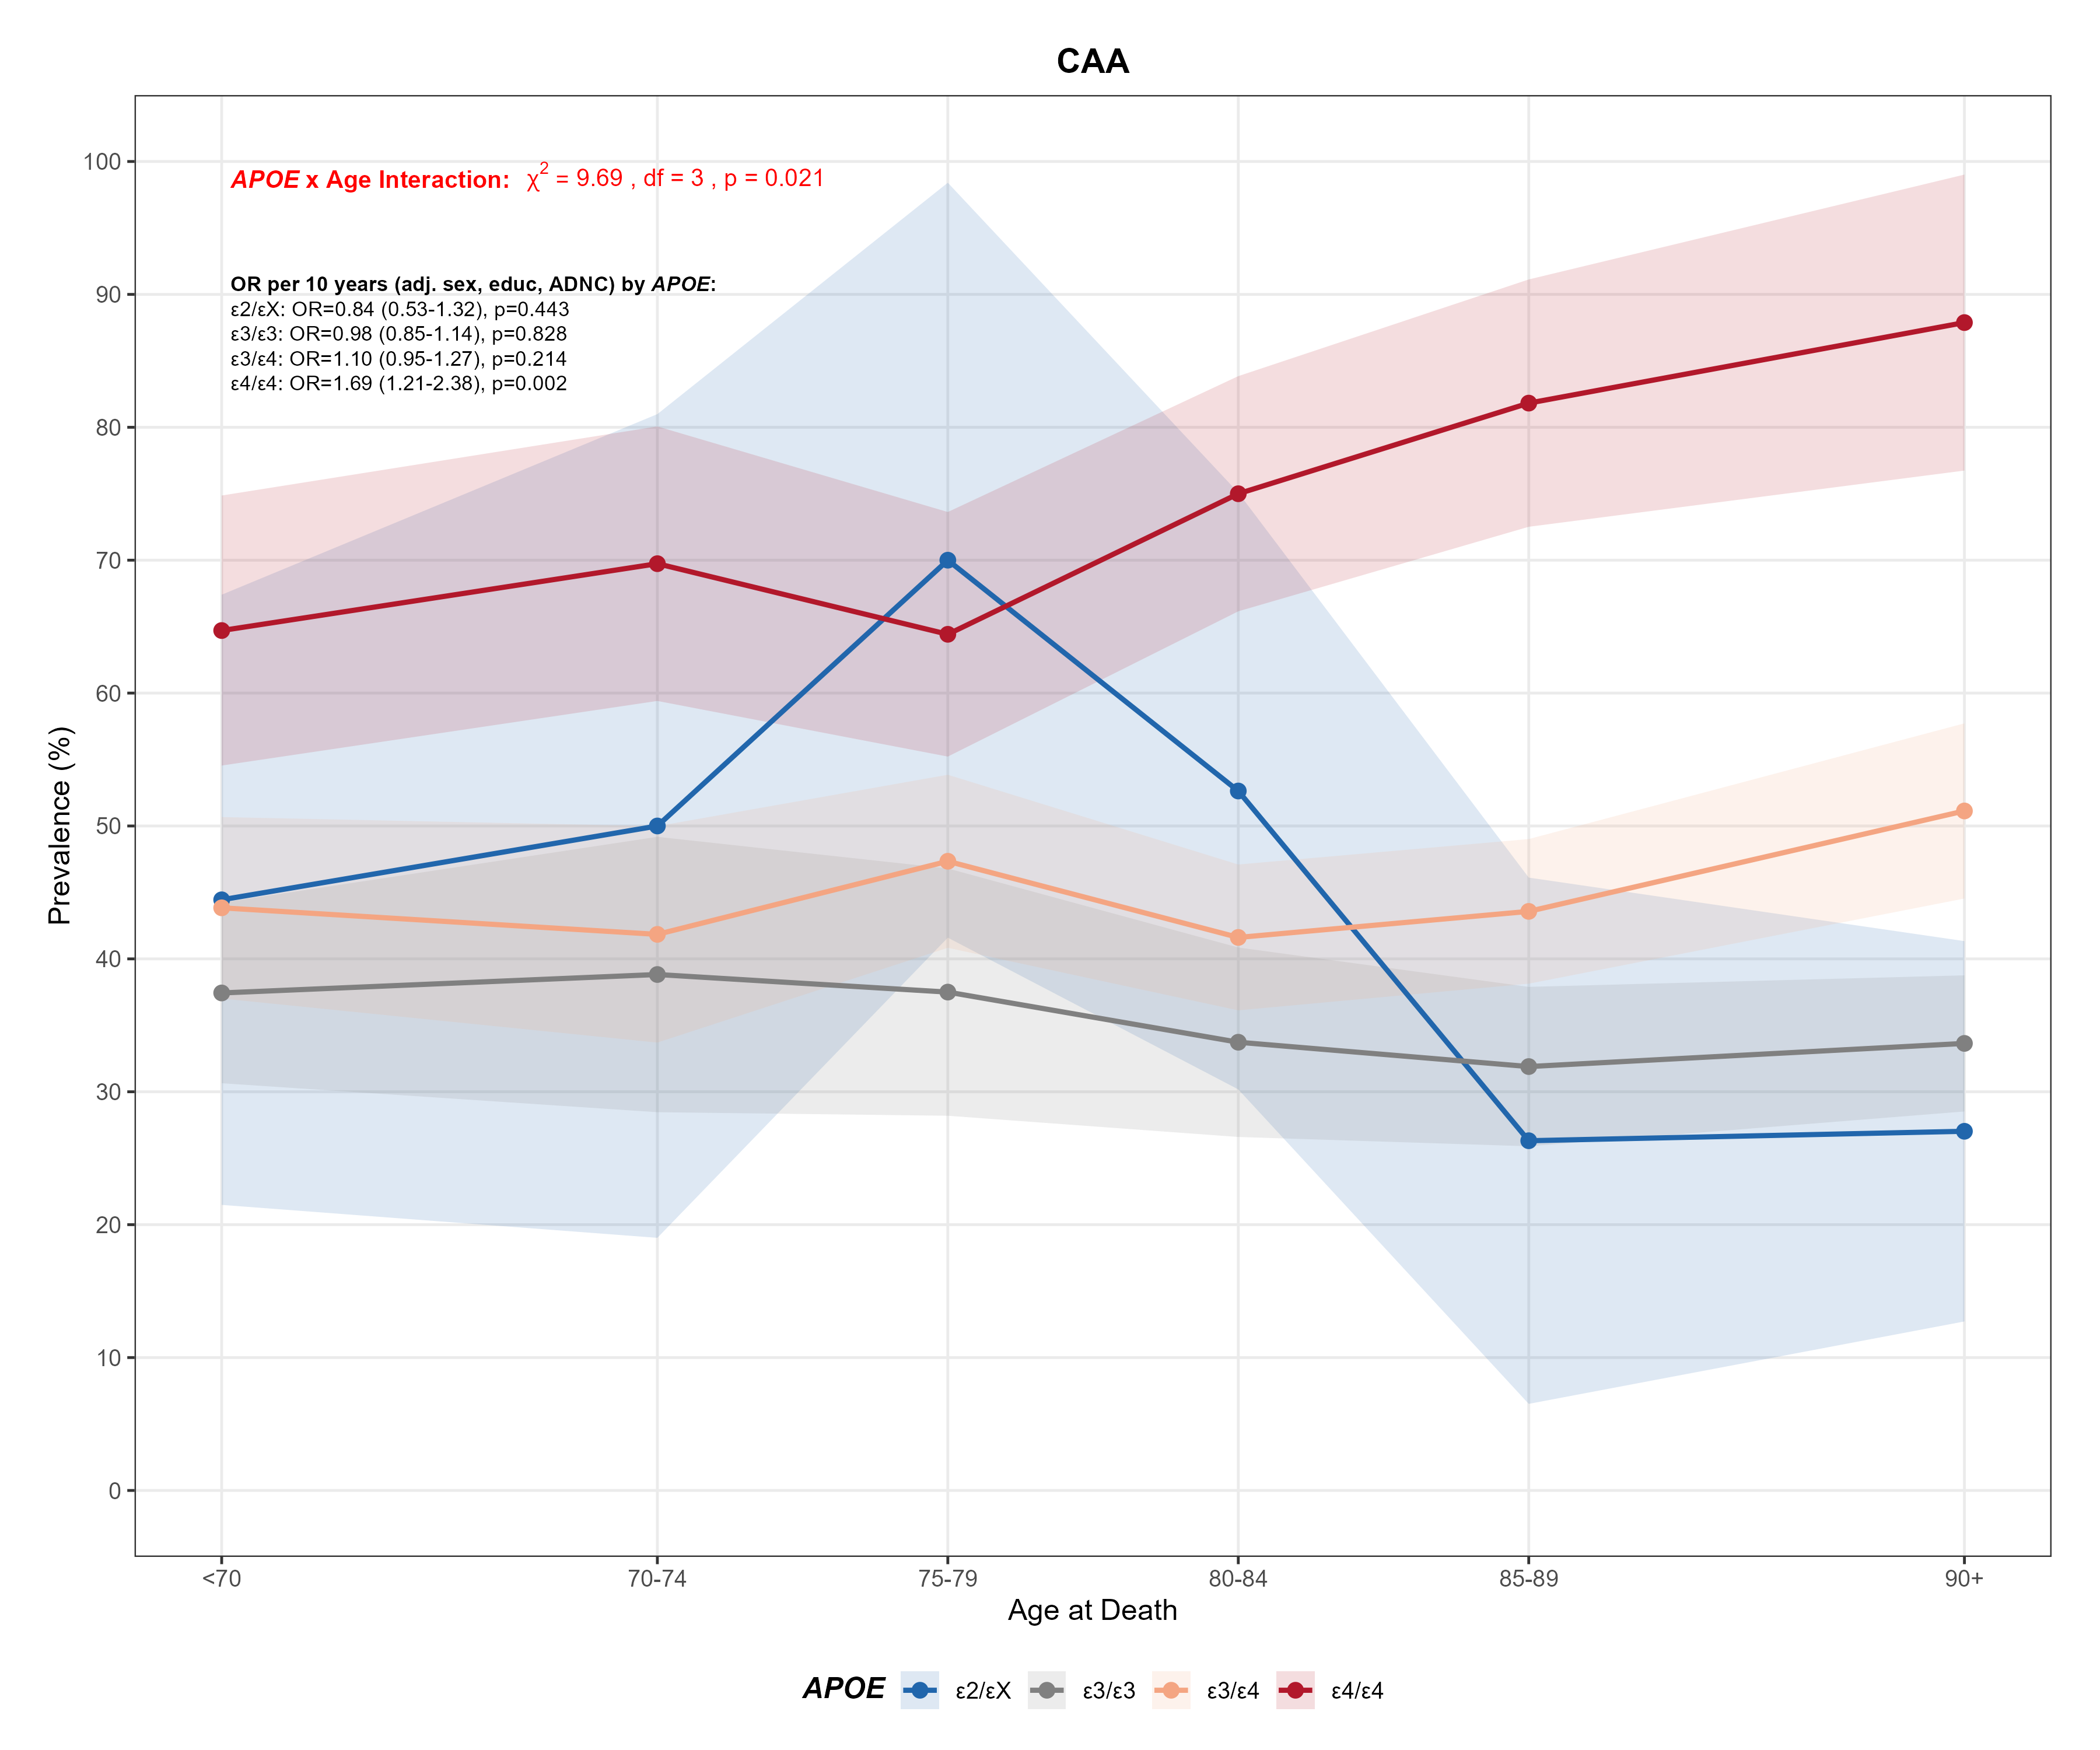

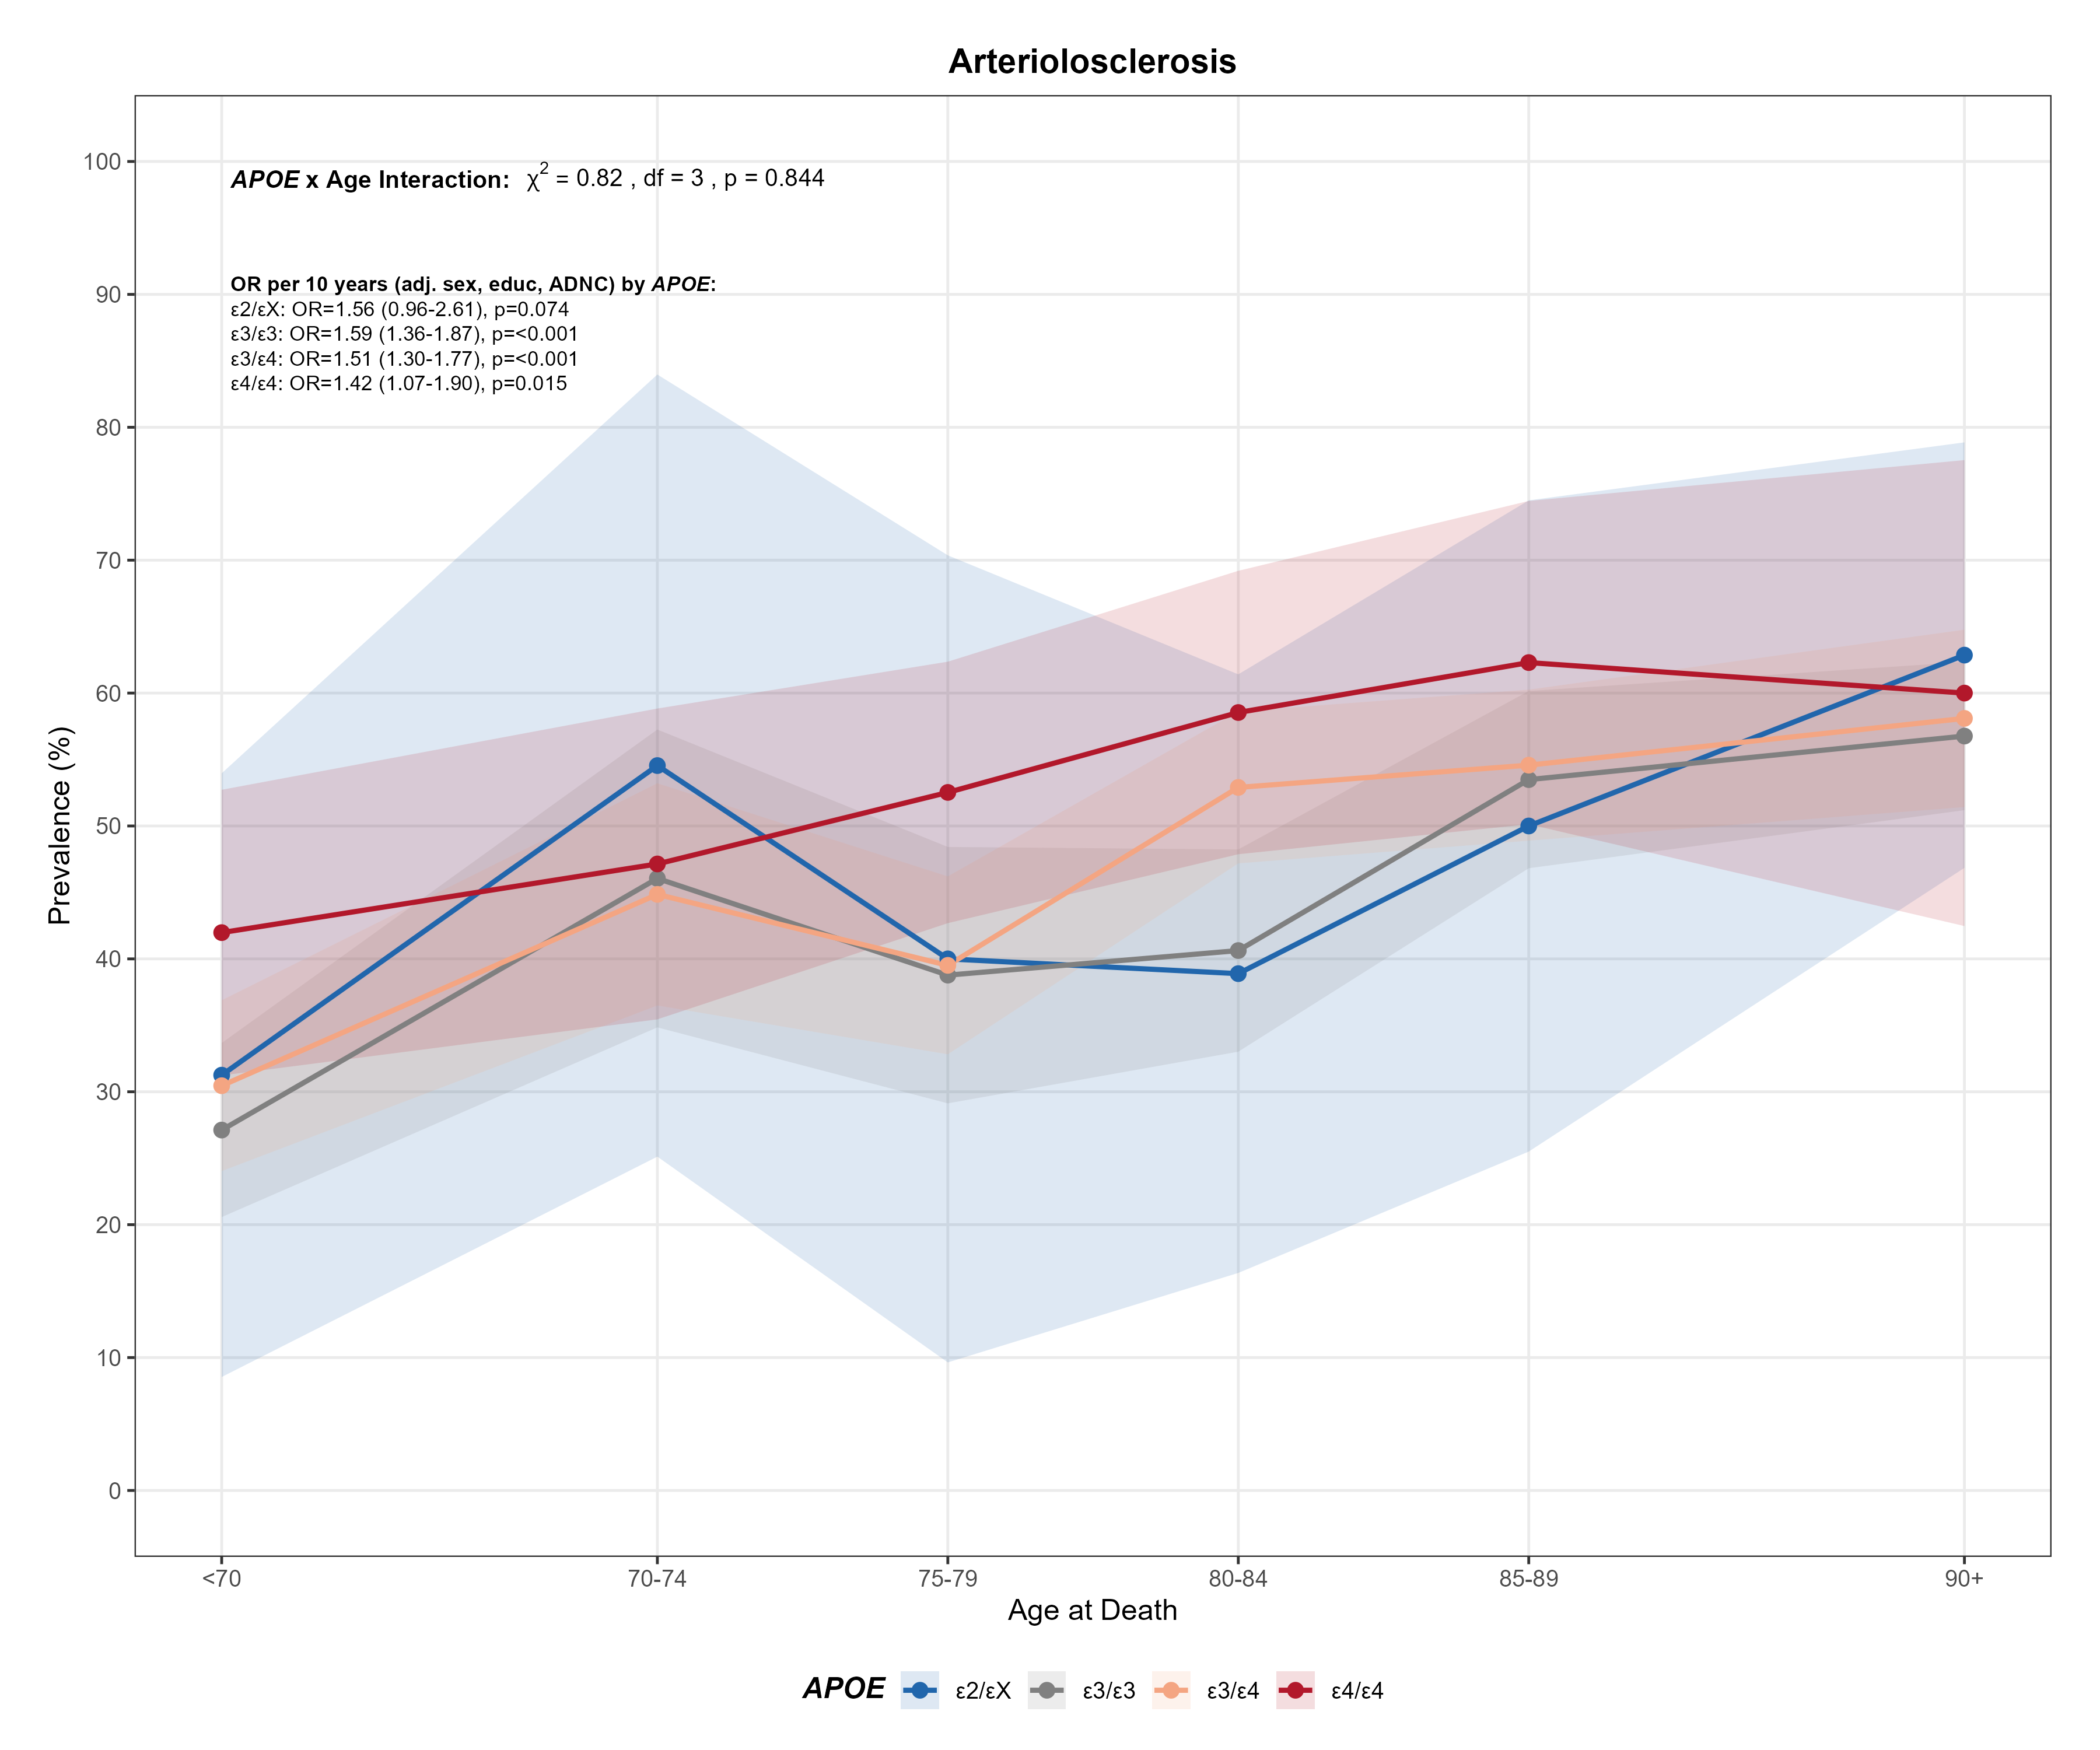

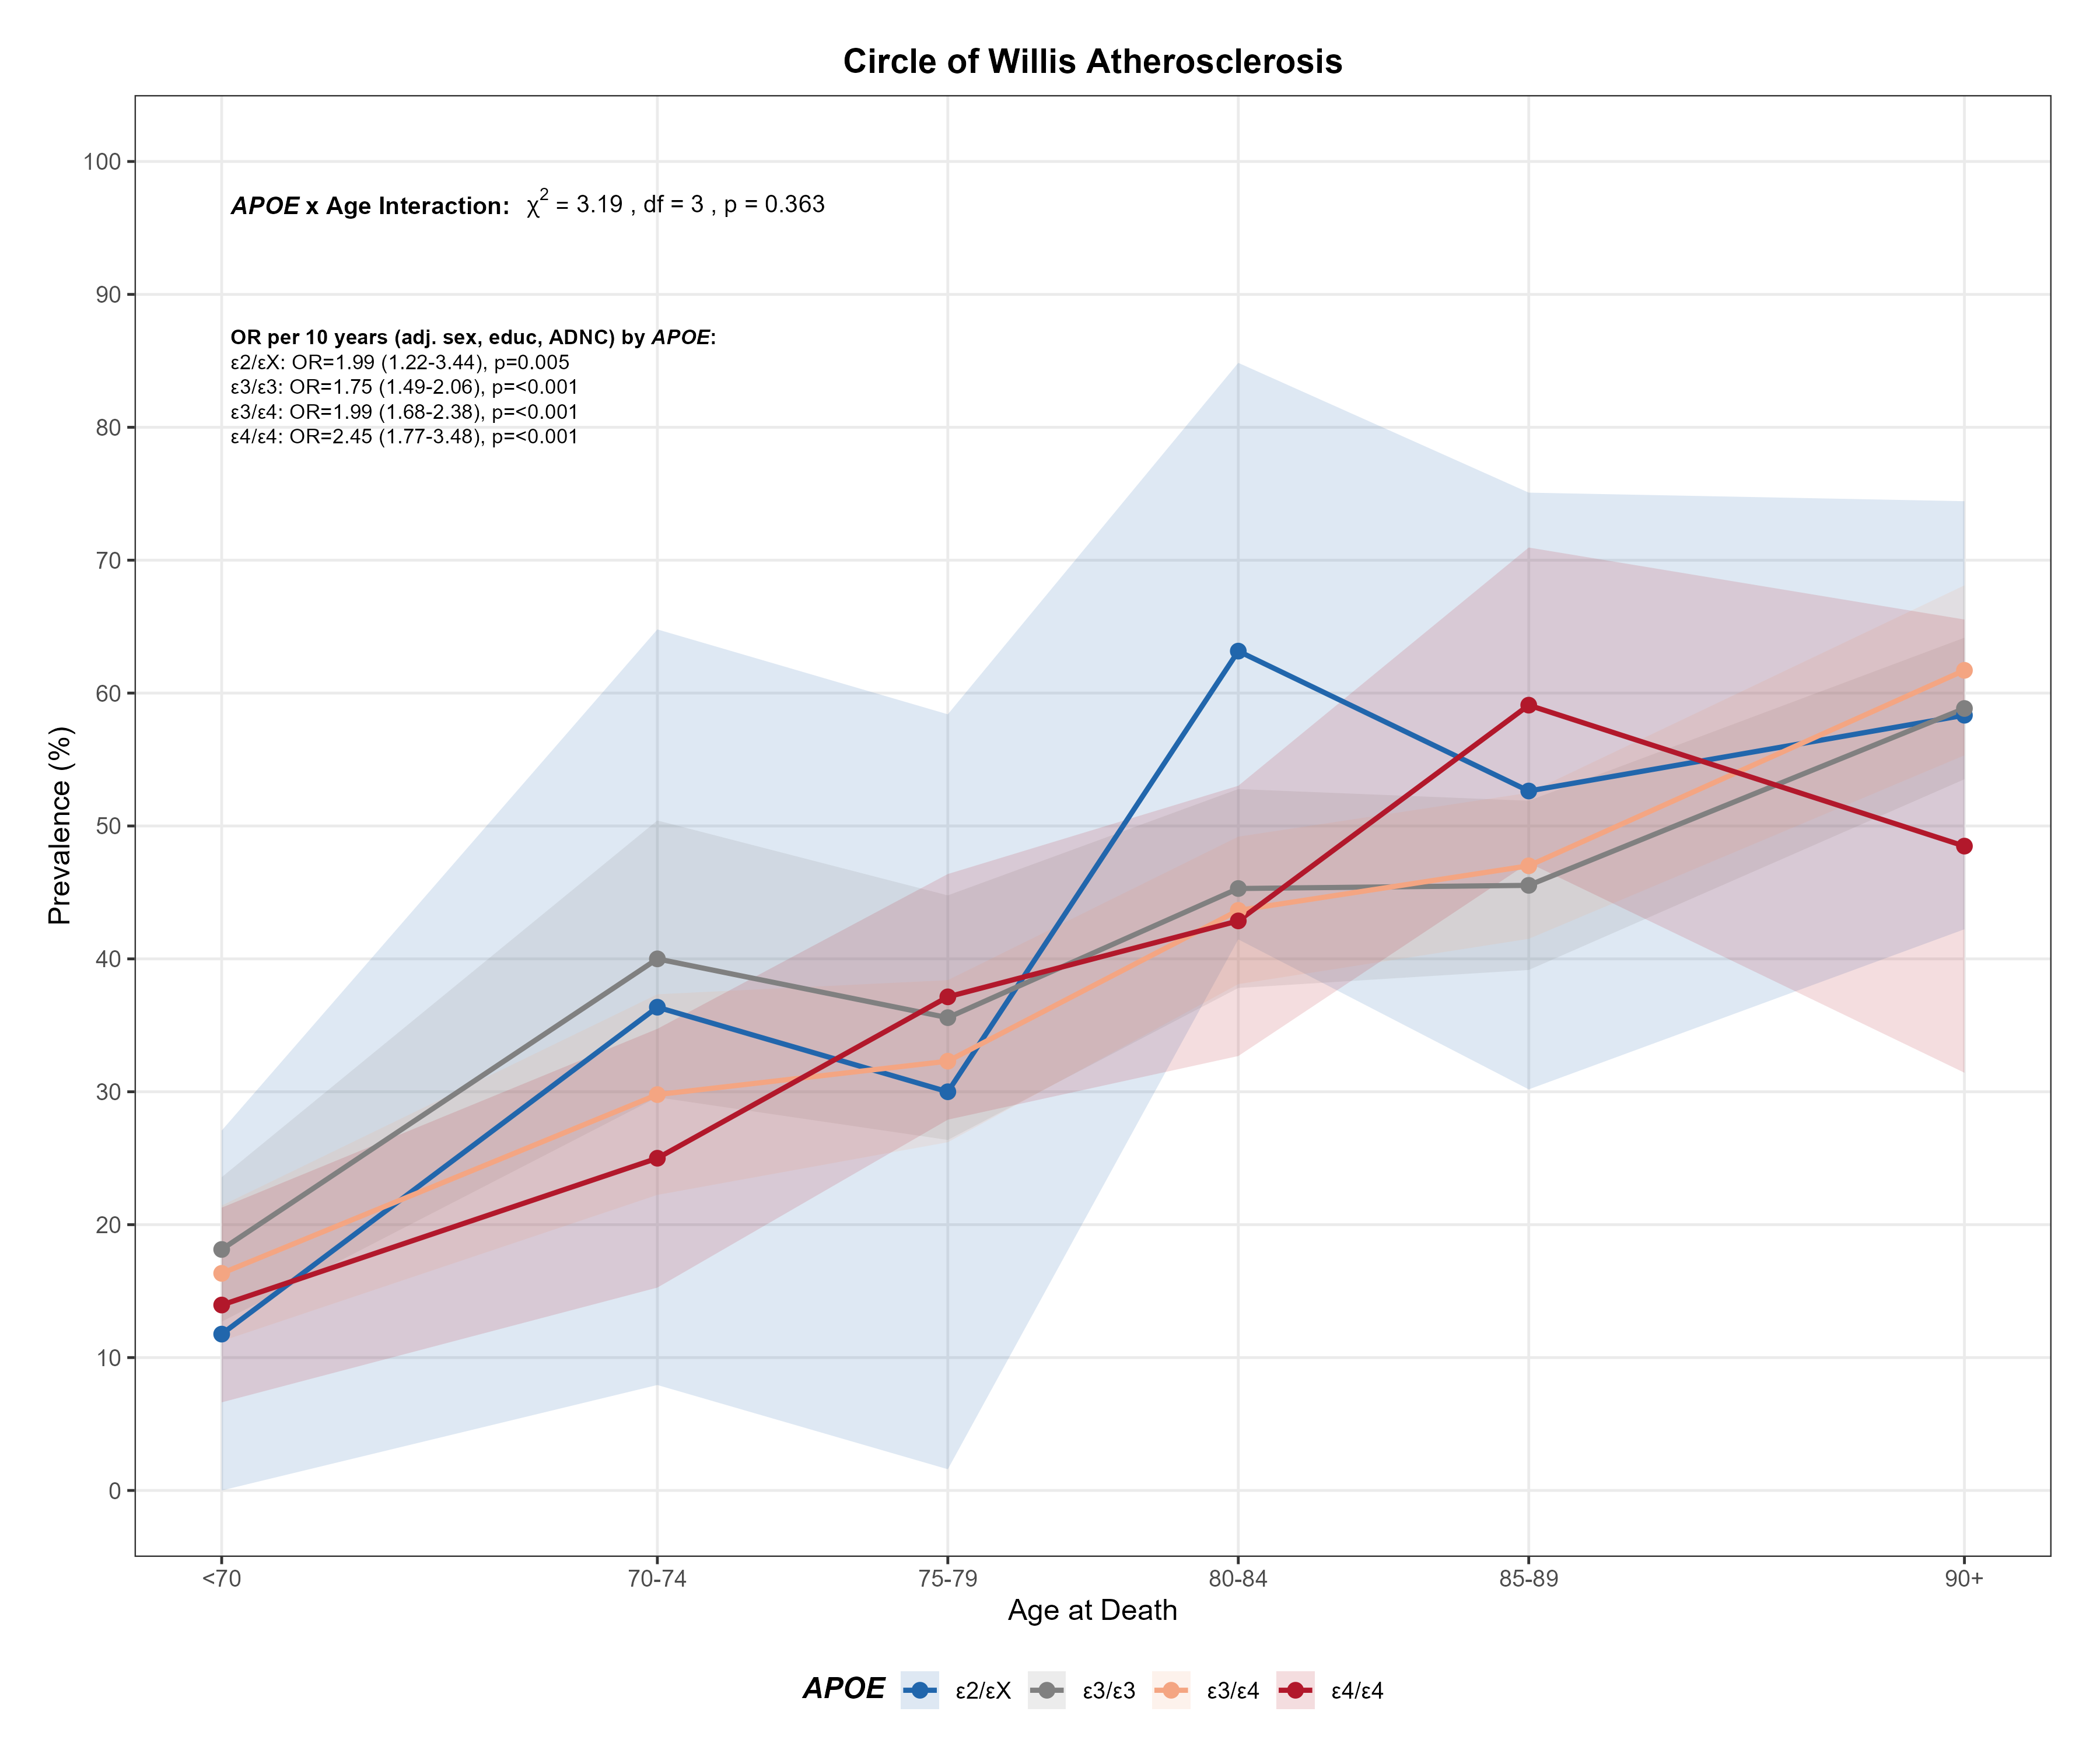


**Supplementary Figure 5. Prevalence of Vascular-related pathologies prevalence by age at death and *APOE* haplotype in amyloid-positive Alzheimer’s disease dementia.** Line plots show the prevalence (%) of vascular-related neuropathologies across age-at-death categories, stratified by *APOE* haplotype, for three outcomes: CAA (upper panel), arteriolosclerosis (middle panel), and atherosclerosis (bottom panel). Shaded areas represent 95% confidence intervals. Odds ratios are estimated per 10-year increase in age using models adjusted for sex, education, and ADNC. *APOE* × age interaction terms were tested for each pathology, with corresponding χ² statistics and p-values shown in each panel. Interaction labels shown in red indicate statistical significance (p < 0.05). AD, Alzheimer's disease; ADNC, Alzheimer's disease neuropathologic change; *APOE*, apolipoprotein E; CAA, cerebral amyloid angiopathy; educ, education; OB, olfactory bulb; OR, odds ratio.

**Supplementary Table 1. A) Association between *APOE* haplotype, amyloid positivity, and Alzheimer's disease diagnosis. B) Sample sizes for primary outcome variables.**

| **Supplementary Table 1A** | | | | | |
| --- | --- | --- | --- | --- | --- |
| **Outcome** | ***APOE* haplotype** | **OR** | **95% CI lower** | **95% CI upper** | **p** |
| Amyloid positive vs. negative | ε2/ε2 | 0.24 | 0.09 | 0.57 | 0.002 |
| Amyloid positive vs. negative | ε2/ε3 | 0.51 | 0.43 | 0.61 | <0.001 |
| Amyloid positive vs. negative | ε2/ε4 | 2.02 | 1.49 | 2.78 | <0.001 |
| Amyloid positive vs. negative | ε3/ε3 | Ref. | — | — | — |
| Amyloid positive vs. negative | ε3/ε4 | 3.28 | 2.91 | 3.69 | <0.001 |
| Amyloid positive vs. negative | ε4/ε4 | 10.30 | 7.70 | 14.11 | <0.001 |
| AD vs. non-AD | ε2/ε2 | 0.81 | 0.37 | 1.71 | 0.586 |
| AD vs. non-AD | ε2/ε3 | 0.67 | 0.56 | 0.80 | <0.001 |
| AD vs. non-AD | ε2/ε4 | 2.18 | 1.62 | 2.97 | <0.001 |
| AD vs. non-AD | ε3/ε3 | Ref. | — | — | — |
| AD vs. non-AD | ε3/ε4 | 2.56 | 2.30 | 2.86 | <0.001 |
| AD vs. non-AD | ε4/ε4 | 5.24 | 4.22 | 6.58 | <0.001 |
| **Supplementary Table 1B** | | | | | |
| **Outcome** | **n total** | **n positive** | **% positive** | | |
| AD vs. non-AD | 7,262 | 4,212 | 58.0 | | |
| Amyloid positive vs. negative | 7,262 | 4,620 | 63.6 | | |

*Reference group: ε3/ε3 carriers.*

*Abbreviations: AD, Alzheimer's disease; APOE, apolipoprotein E; CI, confidence interval; n, number; OR, odds ratio; Ref., reference.*

**Supplementary Table 2**. **Association between *APOE* haplotype and concordant clinicopathological Alzheimer's disease.**

| **APOE haplotype** | **n** | **n (AD, Aβ+)** | **% (AD, Aβ+)** | **n (Clinical AD)** | **% (Clinical AD)** | **Unadjusted OR (95% CI)** | **p** | **Adjusted OR1 (95% CI)** | **p** | **Adjusted OR2 (95% CI)** | **p** |
| --- | --- | --- | --- | --- | --- | --- | --- | --- | --- | --- | --- |
| **ε3/ε3** | 3,441 | 1,211 | 35.2 | 1,652 | 73.3 | Ref. | — | Ref. | — | Ref. | — |
| **ε2/ε2** | 28 | 2 | 7.1 | 12 | 16.7 | 0.14 (0.02–0.48) | 0.008 | 0.14 (0.02–0.46) | 0.007 | 0.14 (0.02–0.51) | 0.010 |
| **ε2/ε3** | 585 | 129 | 22.1 | 224 | 57.6 | 0.52 (0.42–0.64) | <0.001 | 0.52 (0.42–0.64) | <0.001 | 0.50 (0.39–0.63) | <0.001 |
| **ε2/ε4** | 195 | 105 | 53.8 | 130 | 80.8 | 2.15 (1.61–2.88) | <0.001 | 2.13 (1.60–2.86) | <0.001 | 1.73 (1.24–2.43) | 0.001 |
| **ε3/ε4** | 2,399 | 1,490 | 62.1 | 1,688 | 88.3 | 3.02 (2.71–3.36) | <0.001 | 3.04 (2.73–3.39) | <0.001 | 2.73 (2.41–3.10) | <0.001 |
| **ε4/ε4** | 601 | 471 | 78.4 | 498 | 94.6 | 6.67 (5.44–8.23) | <0.001 | 6.79 (5.54–8.38) | <0.001 | 5.59 (4.46–7.07) | <0.001 |

*Percentages represent proportion of each haplotype group with the specified outcome.*

*1-Adjusted for sex and years of education.*

*2-Adjusted for sex, years of education, and age at dementia diagnosis.*

*Abbreviations: AD, Alzheimer's disease; Aβ+, amyloid positive; APOE, apolipoprotein E; CI, confidence interval; OR, odds ratio; Ref., reference.*

**Supplementary Table 3**. **Associations between *APOE* haplotype, age, and ordinal Braak stage across dementia groups.**

| ***APOE* haplotype** | **Group** | **Per 1 year unadjusted OR (95% CI)** | **p** | **Per 10 years unadjusted OR (95% CI)** | **p** | **Per 1 year adjusted OR (95% CI)** | **p** | **Per 10 years adjusted OR (95% CI)** | **p** |
| --- | --- | --- | --- | --- | --- | --- | --- | --- | --- |
| ε2/εX | All-cause dementia | 1.05 (1.03–1.06) | <0.001 | 1.59 (1.36–1.86) | <0.001 | 1.04 (1.03–1.06) | <0.001 | 1.54 (1.32–1.81) | <0.001 |
| ε2/εX | AD dementia | 0.96 (0.94–0.99) | 0.003 | 0.69 (0.54–0.88) | 0.003 | 0.96 (0.93–0.98) | <0.001 | 0.65 (0.50–0.84) | <0.001 |
| ε2/εX | Aβ+ AD dementia | 0.94 (0.90–0.98) | 0.002 | 0.51 (0.33–0.78) | 0.002 | 0.93 (0.89–0.97) | 0.001 | 0.47 (0.30–0.74) | 0.001 |
| ε3/ε3 | All-cause dementia | 1.03 (1.02–1.04) | <0.001 | 1.32 (1.23–1.41) | <0.001 | 1.03 (1.02–1.03) | <0.001 | 1.30 (1.21–1.39) | <0.001 |
| ε3/ε3 | AD dementia | 0.94 (0.93–0.95) | <0.001 | 0.56 (0.50–0.62) | <0.001 | 0.94 (0.93–0.95) | <0.001 | 0.53 (0.47–0.59) | <0.001 |
| ε3/ε3 | Aβ+ AD dementia | 0.93 (0.91–0.94) | <0.001 | 0.46 (0.39–0.55) | <0.001 | 0.92 (0.90–0.94) | <0.001 | 0.43 (0.36–0.52) | <0.001 |
| ε3/ε4 | All-cause dementia | 1.01 (1.00–1.02) | 0.087 | 1.09 (0.99–1.20) | 0.087 | 1.01 (1.00–1.02) | 0.218 | 1.07 (0.96–1.18) | 0.219 |
| ε3/ε4 | AD dementia | 0.93 (0.91–0.94) | <0.001 | 0.47 (0.41–0.56) | <0.001 | 0.93 (0.91–0.94) | <0.001 | 0.46 (0.40–0.55) | <0.001 |
| ε3/ε4 | Aβ+ AD dementia | 0.93 (0.92–0.95) | <0.001 | 0.50 (0.41–0.61) | <0.001 | 0.93 (0.91–0.95) | <0.001 | 0.49 (0.40–0.60) | <0.001 |
| ε4/ε4 | All-cause dementia | 1.02 (0.99–1.05) | 0.222 | 1.20 (0.90–1.60) | 0.224 | 1.02 (0.99–1.05) | 0.297 | 1.17 (0.87–1.56) | 0.301 |
| ε4/ε4 | AD dementia | 0.98 (0.94–1.01) | 0.206 | 0.78 (0.54–1.14) | 0.204 | 0.98 (0.94–1.01) | 0.223 | 0.80 (0.55–1.16) | 0.231 |
| ε4/ε4 | Aβ+ AD dementia | 0.97 (0.93–1.02) | 0.200 | 0.75 (0.49–1.16) | 0.198 | 0.98 (0.93–1.02) | 0.239 | 0.77 (0.51–1.19) | 0.242 |

*Adjusted model for sex and education.*

*Abbreviations: Aβ+, amyloid positive; AD, Alzheimer's disease; APOE, apolipoprotein E; CI, confidence interval; OR, odds ratio.*

**Supplementary Table 4. Regional distribution of Lewy body (A) and TDP-43 pathology (B) by *APOE* haplotype in amyloid-positive AD dementia.**

| **Supplementary Table 4A** | | | | | | | | | | | | |
| --- | --- | --- | --- | --- | --- | --- | --- | --- | --- | --- | --- | --- |
| ***APOE***  **haplotype** | **Lewy body stage** | **Comparison**  **n (%)** | **Reference**  **n (%)** | **χ²** | **Unadjusted OR**  **(95% CI)** | **p** | **Adjusted LRχ²** | **Adjusted OR**  **(95% CI)** | **p** | **ADNC-adjusted LRχ²** | **ADNC-adjusted OR**  **(95% CI)** | **p** |
| ε2/εX | LB present/OB only | 4 (3.5%) | 35 (3.1%) | 0.06 | 1.14 (0.29–3.26) | 0.813 | 0.10 | 1.20 (0.35–3.09) | 0.747 | 0.51 | 1.82 (0.27–7.19) | 0.477 |
| ε2/εX | Brainstem predominant | 6 (5.3%) | 32 (2.9%) | 2.06 | 1.90 (0.64–4.75) | 0.152 | 1.73 | 1.91 (0.70–4.38) | 0.189 | 0.00 | 1.00 (0.23–3.10) | 1.000 |
| ε2/εX | Limbic/Amygdala predominant | 18 (15.9%) | 226 (20.2%) | 1.19 | 0.75 (0.42–1.28) | 0.276 | 1.27 | 0.74 (0.43–1.23) | 0.260 | 1.11 | 0.74 (0.41–1.28) | 0.292 |
| ε2/εX | Neocortical | 16 (14.2%) | 123 (11.0%) | 1.02 | 1.33 (0.71–2.37) | 0.312 | 0.98 | 1.34 (0.74–2.29) | 0.322 | 0.02 | 1.06 (0.49–2.06) | 0.882 |
| **ε3/ε4** | **LB present/OB only** | **84 (5.9%)** | **35 (3.1%)** | **10.61** | **1.93 (1.28–2.98)** | **0.001** | **10.29** | **1.89 (1.28–2.87)** | **0.001** | **5.57** | **2.27 (1.14–4.93)** | **0.018** |
| ε3/ε4 | Brainstem predominant | 38 (2.7%) | 32 (2.9%) | 0.10 | 0.93 (0.56–1.54) | 0.754 | 0.01 | 0.98 (0.61–1.59) | 0.931 | 0.00 | 1.00 (0.53–1.88) | 0.993 |
| ε3/ε4 | Limbic/Amygdala predominant | 331 (23.1%) | 226 (20.2%) | 3.16 | 1.19 (0.98–1.45) | 0.076 | 2.17 | 1.16 (0.95–1.40) | 0.141 | 0.83 | 1.11 (0.89–1.39) | 0.363 |
| **ε3/ε4** | **Neocortical** | **208 (14.5%)** | **123 (11.0%)** | **6.97** | **1.38 (1.08–1.76)** | **0.008** | **6.54** | **1.36 (1.07–1.73)** | **0.011** | **6.96** | **1.50 (1.11–2.04)** | **0.008** |
| ε4/ε4 | LB present/OB only | 34 (7.4%) | 35 (3.1%) | 14.30 | 2.48 (1.48–4.15) | <0.001 | 12.08 | 2.44 (1.48–4.03) | <0.001 | 0.99 | 1.68 (0.59–4.59) | 0.320 |
| ε4/ε4 | Brainstem predominant | 9 (2.0%) | 32 (2.9%) | 1.03 | 0.68 (0.28–1.47) | 0.310 | 0.39 | 0.79 (0.34–1.63) | 0.531 | 2.91 | 0.32 (0.05–1.16) | 0.088 |
| **ε4/ε4** | **Limbic/Amygdala predominant** | **133 (29.0%)** | **226 (20.2%)** | **14.38** | **1.62 (1.25–2.09)** | **<0.001** | **8.05** | **1.45 (1.12–1.87)** | **0.005** | **10.35** | **1.63 (1.21–2.19)** | **0.001** |
| ε4/ε4 | Neocortical | 65 (14.2%) | 123 (11.0%) | 3.15 | 1.34 (0.95–1.87) | 0.076 | 3.20 | 1.36 (0.97–1.88) | 0.074 | 2.99 | 1.46 (0.95–2.23) | 0.084 |
| **Supplementary Table 4B** | | | | | | | | | | | | |
| ***APOE***  **haplotype** | **TDP-43 stage** | **Comparison**  **n (%)** | **Reference**  **n (%)** | **χ²** | **Unadjusted OR**  **(95% CI)** | **p** | **Adjusted LRχ²** | **Adjusted OR**  **(95% CI)** | **p** | **ADNC-adjusted LRχ²** | **ADNC-adjusted OR**  **(95% CI)** | **p** |
| ε2/εX | Amygdala | 2 (5.4%) | 32 (10.8%) | 1.04 | 0.47 (0.05–2.00) | 0.308 | 1.07 | 0.49 (0.08–1.74) | 0.302 | 1.04 | 0.49 (0.08–1.75) | 0.307 |
| ε2/εX | Hippocampus | 6 (16.2%) | 35 (11.8%) | 0.60 | 1.45 (0.46–3.87) | 0.439 | 0.37 | 1.35 (0.48–3.31) | 0.546 | 0.31 | 1.33 (0.46–3.33) | 0.578 |
| ε2/εX | Entorhinal/inf. temporal | 11 (29.7%) | 109 (36.7%) | 0.69 | 0.73 (0.31–1.60) | 0.405 | 0.93 | 0.69 (0.31–1.45) | 0.335 | 0.69 | 0.73 (0.33–1.53) | 0.406 |
| ε2/εX | Neocortex | 5 (13.5%) | 51 (17.2%) | 0.32 | 0.75 (0.22–2.08) | 0.574 | 0.23 | 0.79 (0.26–1.99) | 0.635 | 0.61 | 0.67 (0.21–1.75) | 0.435 |
| ε3/ε4 | Amygdala | 67 (15.2%) | 32 (10.8%) | 3.02 | 1.49 (0.93–2.41) | 0.082 | 2.50 | 1.44 (0.92–2.28) | 0.114 | 2.26 | 1.41 (0.90–2.25) | 0.133 |
| ε3/ε4 | Hippocampus | 57 (13.0%) | 35 (11.8%) | 0.22 | 1.11 (0.70–1.80) | 0.637 | 0.28 | 1.13 (0.72–1.80) | 0.596 | 0.23 | 1.12 (0.71–1.78) | 0.629 |
| ε3/ε4 | Entorhinal/inf. temporal | 162 (36.8%) | 109 (36.7%) | 0.00 | 1.01 (0.73–1.38) | 0.974 | 0.10 | 1.05 (0.77–1.44) | 0.747 | 0.06 | 1.04 (0.76–1.43) | 0.802 |
| ε3/ε4 | Neocortex | 61 (13.9%) | 51 (17.2%) | 1.51 | 0.78 (0.51–1.19) | 0.220 | 0.45 | 0.87 (0.57–1.32) | 0.503 | 0.32 | 0.89 (0.58–1.35) | 0.572 |
| ε4/ε4 | Amygdala | 27 (19.6%) | 32 (10.8%) | 6.21 | 2.01 (1.10–3.65) | 0.013 | 3.50 | 1.75 (0.97–3.15) | 0.062 | 3.12 | 1.70 (0.94–3.05) | 0.077 |
| ε4/ε4 | Hippocampus | 19 (13.8%) | 35 (11.8%) | 0.34 | 1.20 (0.62–2.25) | 0.559 | 0.80 | 1.35 (0.70–2.55) | 0.370 | 0.58 | 1.29 (0.67–2.43) | 0.445 |
| ε4/ε4 | Entorhinal/inf. temporal | 49 (35.5%) | 109 (36.7%) | 0.06 | 0.95 (0.61–1.48) | 0.810 | 0.85 | 1.24 (0.78–1.96) | 0.358 | 0.72 | 1.22 (0.77–1.93) | 0.397 |
| ε4/ε4 | Neocortex | 18 (13.0%) | 51 (17.2%) | 1.20 | 0.72 (0.38–1.33) | 0.273 | 0.28 | 0.85 (0.45–1.56) | 0.599 | 0.10 | 0.90 (0.47–1.68) | 0.749 |

*Reference group: ε3/ε3 carriers with amyloid-positive AD dementia.*

*Bold rows indicate statistically significant associations (p < 0.05) in ADNC-adjusted models.*

*Adjusted models include sex, education, and age at death; ADNC-adjusted models additionally include ADNC.*

*Abbreviations: ADNC, Alzheimer's disease neuropathologic change; APOE, apolipoprotein E; CI, confidence interval; inf., inferior; LB, Lewy body; OB, olfactory bulb; OR, odds ratio; TAR DNA-binding protein 43.*

**Supplementary Table 5. Region-specific associations between age and Lewy body (A) and TDP-43 (B) pathology by *APOE* haplotype.**

| **Supplementary Table 5A** | | | | | | | | | | |
| --- | --- | --- | --- | --- | --- | --- | --- | --- | --- | --- |
| ***APOE***  **haplotype** | **Lewy body stage** | **χ²** | **Unadjusted OR/10 yr**  **(95% CI)** | **p** | **Adjusted LRχ²** | **Adjusted OR/10 yr**  **(95% CI)** | **p** | **ADNC-Adjusted LRχ²** | **ADNC-adjusted OR/10 yr**  **(95% CI)** | **p** |
| ε2/εX | LB present/OB only | — | — | — | — | — | — | — | — | — |
| ε2/εX | Brainstem predominant | 2.68 | 2.10 (0.88–6.67) | 0.102 | 4.45 | 3.31 (1.07–16.55) | 0.035 | 1.24 | 2.65 (0.51–27.99) | 0.266 |
| ε2/εX | Limbic/Amygdala predominant | 0.00 | 1.00 (0.63–1.62) | 0.997 | 0.00 | 1.01 (0.64–1.65) | 0.973 | 0.45 | 1.21 (0.70–2.15) | 0.501 |
| ε2/εX | Neocortical | 0.22 | 0.89 (0.56–1.46) | 0.638 | 0.05 | 0.95 (0.58–1.58) | 0.823 | 0.00 | 0.99 (0.48–2.10) | 0.980 |
| ε3/ε3 | LB present/OB only | 3.81 | 0.75 (0.57–1.00) | 0.051 | 4.11 | 0.74 (0.56–0.99) | 0.043 | 0.87 | 1.31 (0.75–2.47) | 0.351 |
| ε3/ε3 | Brainstem predominant | 1.53 | 1.23 (0.89–1.75) | 0.216 | 2.25 | 1.30 (0.93–1.89) | 0.134 | 1.49 | 1.33 (0.85–2.21) | 0.222 |
| **ε3/ε3** | **Limbic/Amygdala predominant** | **14.65** | **0.78 (0.69–0.89)** | **<0.001** | **13.81** | **0.78 (0.69–0.89)** | **<0.001** | **8.09** | **0.80 (0.68–0.93)** | **0.004** |
| ε3/ε3 | Neocortical | 0.14 | 1.03 (0.88–1.23) | 0.705 | 0.40 | 1.06 (0.89–1.26) | 0.530 | 1.24 | 1.14 (0.91–1.45) | 0.266 |
| ε3/ε4 | LB present/OB only | 0.92 | 0.90 (0.72–1.13) | 0.338 | 0.51 | 0.92 (0.73–1.16) | 0.473 | 1.06 | 0.82 (0.57–1.20) | 0.303 |
| ε3/ε4 | Brainstem predominant | 0.89 | 1.18 (0.84–1.70) | 0.346 | 1.79 | 1.28 (0.90–1.86) | 0.181 | 1.13 | 1.31 (0.80–2.25) | 0.288 |
| ε3/ε4 | Limbic/Amygdala predominant | 4.89 | 0.87 (0.76–0.98) | 0.027 | 5.47 | 0.86 (0.76–0.98) | 0.019 | 0.61 | 0.94 (0.81–1.10) | 0.433 |
| ε3/ε4 | Neocortical | 5.66 | 0.83 (0.72–0.97) | 0.017 | 5.59 | 0.83 (0.72–0.97) | 0.018 | 1.14 | 0.90 (0.74–1.09) | 0.285 |
| ε4/ε4 | LB present/OB only | 2.19 | 1.37 (0.90–2.11) | 0.139 | 2.24 | 1.37 (0.91–2.11) | 0.134 | 0.48 | 1.36 (0.58–3.46) | 0.488 |
| ε4/ε4 | Brainstem predominant | 2.19 | 1.84 (0.82–4.36) | 0.139 | 2.39 | 1.96 (0.84–4.91) | 0.122 | 0.48 | 1.81 (0.35–13.48) | 0.488 |
| ε4/ε4 | Limbic/Amygdala predominant | 5.68 | 0.75 (0.59–0.95) | 0.017 | 6.19 | 0.74 (0.58–0.94) | 0.013 | 0.96 | 0.87 (0.65–1.15) | 0.328 |
| ε4/ε4 | Neocortical | 0.01 | 1.01 (0.74–1.38) | 0.945 | 0.02 | 1.02 (0.75–1.39) | 0.902 | 0.01 | 1.01 (0.69–1.49) | 0.945 |
| **Supplementary Table 5B** | | | | | | | | | | |
| ***APOE***  **haplotype** | **TDP-43 stage** | **χ²** | **Unadjusted OR/10 yr**  **(95% CI)** | **p** | **Adjusted LRχ²** | **Adjusted OR/10 yr**  **(95% CI)** | **p** | **ADNC-Adjusted LRχ²** | **ADNC-adjusted OR/10 yr**  **(95% CI)** | **p** |
| ε2/εX | Spinal cord | — | — | — | — | — | — | — | — | — |
| ε2/εX | Amygdala | — | — | — | — | — | — | — | — | — |
| ε2/εX | Hippocampus | 0.04 | 1.09 (0.47–2.88) | 0.849 | 0.07 | 0.88 (0.33–2.45) | 0.788 | 0.00 | 1.00 (0.37–2.88) | 0.997 |
| ε2/εX | Entorhinal/inf. temporal | 2.16 | 1.76 (0.84–4.41) | 0.141 | 2.66 | 1.97 (0.88–5.29) | 0.103 | 3.01 | 2.06 (0.92–5.51) | 0.083 |
| ε2/εX | Neocortex | 0.79 | 1.59 (0.60–5.73) | 0.373 | 1.06 | 1.78 (0.62–7.17) | 0.304 | 0.28 | 1.44 (0.39–7.36) | 0.596 |
| ε3/ε3 | Spinal cord | — | — | — | — | — | — | — | — | — |
| ε3/ε3 | Amygdala | 1.18 | 0.83 (0.60–1.16) | 0.278 | 1.14 | 0.83 (0.60–1.17) | 0.286 | 1.25 | 0.81 (0.57–1.17) | 0.263 |
| ε3/ε3 | Hippocampus | 1.51 | 1.24 (0.89–1.78) | 0.219 | 1.19 | 1.21 (0.87–1.74) | 0.276 | 2.20 | 1.32 (0.92–1.97) | 0.138 |
| **ε3/ε3** | **Entorhinal/inf. temporal** | **14.09** | **1.56 (1.23–2.00)** | **<0.001** | **13.07** | **1.54 (1.21–1.98)** | **<0.001** | **10.01** | **1.51 (1.17–1.99)** | **0.002** |
| ε3/ε3 | Neocortex | 2.86 | 1.29 (0.96–1.76) | 0.091 | 2.65 | 1.28 (0.95–1.76) | 0.103 | 1.44 | 1.23 (0.88–1.75) | 0.230 |
| ε3/ε4 | Spinal cord | — | — | — | — | — | — | — | — | — |
| **ε3/ε4** | **Amygdala** | **4.59** | **0.73 (0.54–0.97)** | **0.032** | **4.68** | **0.72 (0.54–0.97)** | **0.031** | **4.07** | **0.73 (0.55–0.99)** | **0.044** |
| ε3/ε4 | Hippocampus | 0.26 | 1.09 (0.79–1.53) | 0.613 | 0.24 | 1.09 (0.79–1.52) | 0.625 | 0.02 | 1.03 (0.74–1.45) | 0.877 |
| ε3/ε4 | Entorhinal/inf. temporal | 2.40 | 1.20 (0.95–1.51) | 0.122 | 2.17 | 1.19 (0.94–1.51) | 0.141 | 3.34 | 1.25 (0.98–1.59) | 0.067 |
| **ε3/ε4** | **Neocortex** | **16.61** | **2.08 (1.45–3.08)** | **<0.001** | **17.17** | **2.12 (1.47–3.15)** | **<0.001** | **13.79** | **2.01 (1.38–3.01)** | **<0.001** |
| ε4/ε4 | Spinal cord | — | — | — | — | — | — | — | — | — |
| **ε4/ε4** | **Amygdala** | **3.77** | **0.59 (0.34–1.01)** | **0.052** | **4.09** | **0.57 (0.32–0.98)** | **0.043** | **4.14** | **0.57 (0.31–0.98)** | **0.042** |
| ε4/ε4 | Hippocampus | 0.07 | 1.08 (0.59–1.97) | 0.798 | 0.06 | 1.08 (0.60–1.96) | 0.801 | 0.12 | 1.11 (0.61–2.03) | 0.728 |
| ε4/ε4 | Entorhinal/inf. temporal | 1.53 | 1.31 (0.85–2.05) | 0.216 | 1.58 | 1.32 (0.86–2.08) | 0.209 | 1.38 | 1.30 (0.84–2.06) | 0.241 |
| ε4/ε4 | Neocortex | 2.53 | 1.65 (0.89–3.14) | 0.112 | 2.28 | 1.60 (0.87–3.06) | 0.131 | 2.42 | 1.63 (0.88–3.13) | 0.120 |

*Bold rows indicate statistically significant associations (p < 0.05) in ADNC-adjusted models.*

*Adjusted models include sex and education; ADNC-adjusted models additionally include ADNC.*

*Abbreviations: ADNC, Alzheimer's disease neuropathologic change; APOE, apolipoprotein E; CI, confidence interval; inf., inferior; LB, Lewy body; OB, olfactory bulb; OR, odds ratio; TAR DNA-binding protein 43; yr, years.*

**Supplementary Table 6. Region-specific associations between dementia duration and Lewy body (A) and TDP-43 (B) pathology by *APOE* haplotype.**

| **Supplementary Table 6A** | | | | | | | | | | |
| --- | --- | --- | --- | --- | --- | --- | --- | --- | --- | --- |
| ***APOE***  **haplotype** | **Lewy body stage** | **χ²** | **Unadjusted OR/yr**  **(95% CI)** | **p** | **Adjusted LRχ²** | **Adjusted OR/yr**  **(95% CI)** | **p** | **ADNC-Adjusted LRχ²** | **ADNC-adjusted OR/yr**  **(95% CI)** | **p** |
| ε2/εX | LB present/OB only | — | — | — | — | — | — | — | — | — |
| ε2/εX | Brainstem predominant | 0.45 | 0.91 (0.65–1.18) | 0.504 | 0.11 | 1.06 (0.72–1.48) | 0.739 | 0.03 | 1.04 (0.61–1.61) | 0.856 |
| ε2/εX | Limbic/Amygdala predominant | 3.39 | 1.15 (0.99–1.34) | 0.066 | 3.19 | 1.16 (0.99–1.36) | 0.074 | 1.36 | 1.11 (0.93–1.32) | 0.244 |
| ε2/εX | Neocortical | 0.96 | 0.92 (0.75–1.09) | 0.328 | 0.84 | 0.92 (0.74–1.10) | 0.360 | 0.04 | 0.98 (0.76–1.22) | 0.841 |
| ε3/ε3 | LB present/OB only | 3.32 | 0.89 (0.78–1.01) | 0.068 | 5.44 | 0.86 (0.74–0.98) | 0.020 | 0.02 | 0.98 (0.78–1.22) | 0.883 |
| ε3/ε3 | Brainstem predominant | 0.30 | 0.97 (0.85–1.09) | 0.583 | 0.01 | 1.01 (0.88–1.14) | 0.941 | 0.28 | 0.96 (0.82–1.11) | 0.599 |
| **ε3/ε3** | **Limbic/Amygdala predominant** | **49.88** | **1.19 (1.13–1.25)** | **<0.001** | **36.58** | **1.17 (1.11–1.23)** | **<0.001** | **10.06** | **1.10 (1.04–1.17)** | **0.002** |
| ε3/ε3 | Neocortical | 1.58 | 0.96 (0.90–1.02) | 0.208 | 0.80 | 0.97 (0.90–1.04) | 0.372 | 0.45 | 0.97 (0.89–1.06) | 0.502 |
| **ε3/ε4** | **LB present/OB only** | **9.43** | **0.89 (0.82–0.96)** | **0.002** | **8.35** | **0.89 (0.82–0.97)** | **0.004** | **4.04** | **0.88 (0.77–1.00)** | **0.044** |
| ε3/ε4 | Brainstem predominant | 2.80 | 0.91 (0.81–1.02) | 0.095 | 0.78 | 0.95 (0.84–1.06) | 0.378 | 1.13 | 1.08 (0.94–1.23) | 0.287 |
| **ε3/ε4** | **Limbic/Amygdala predominant** | **57.01** | **1.16 (1.11–1.20)** | **<0.001** | **46.52** | **1.15 (1.10–1.19)** | **<0.001** | **12.85** | **1.09 (1.04–1.14)** | **<0.001** |
| ε3/ε4 | Neocortical | 0.52 | 0.98 (0.94–1.03) | 0.472 | 1.30 | 0.97 (0.93–1.02) | 0.255 | 1.91 | 0.96 (0.90–1.02) | 0.167 |
| ε4/ε4 | LB present/OB only | 7.44 | 0.84 (0.74–0.96) | 0.006 | 4.80 | 0.87 (0.75–0.99) | 0.028 | 3.40 | 1.26 (0.99–1.64) | 0.065 |
| ε4/ε4 | Brainstem predominant | 0.75 | 0.91 (0.71–1.12) | 0.388 | 0.01 | 0.99 (0.76–1.23) | 0.919 | 0.04 | 1.05 (0.62–1.72) | 0.851 |
| ε4/ε4 | Limbic/Amygdala predominant | 19.76 | 1.16 (1.08–1.23) | <0.001 | 11.69 | 1.12 (1.05–1.20) | <0.001 | 0.00 | 1.00 (0.93–1.08) | 0.988 |
| ε4/ε4 | Neocortical | 0.14 | 0.98 (0.90–1.07) | 0.707 | 0.07 | 0.99 (0.90–1.08) | 0.789 | 0.04 | 0.99 (0.89–1.10) | 0.835 |
| **Supplementary Table 6B** | | | | | | | | | | |
| ***APOE***  **haplotype** | **TDP-43 stage** | **χ²** | **Unadjusted OR/yr**  **(95% CI)** | **p** | **Adjusted LRχ²** | **Adjusted OR/yr**  **(95% CI)** | **p** | **ADNC-Adjusted LRχ²** | **ADNC-adjusted OR/yr**  **(95% CI)** | **p** |
| ε2/εX | Spinal cord | — | — | — | — | — | — | — | — | — |
| ε2/εX | Amygdala | — | — | — | — | — | — | — | — | — |
| ε2/εX | Hippocampus | 1.94 | 0.82 (0.58–1.07) | 0.164 | 1.97 | 0.79 (0.51–1.09) | 0.160 | 3.12 | 0.70 (0.37–1.03) | 0.077 |
| **ε2/εX** | **Entorhinal/inf. temporal** | **3.72** | **1.21 (1.00–1.52)** | **0.054** | **5.48** | **1.29 (1.04–1.68)** | **0.019** | **5.84** | **1.31 (1.05–1.71)** | **0.016** |
| ε2/εX | Neocortex | 0.04 | 0.97 (0.73–1.25) | 0.835 | 0.02 | 1.02 (0.75–1.35) | 0.878 | 0.02 | 1.02 (0.73–1.39) | 0.882 |
| ε3/ε3 | Spinal cord | — | — | — | — | — | — | — | — | — |
| ε3/ε3 | Amygdala | 0.05 | 0.99 (0.88–1.10) | 0.828 | 0.12 | 0.98 (0.87–1.10) | 0.735 | 0.19 | 0.97 (0.86–1.10) | 0.659 |
| ε3/ε3 | Hippocampus | 0.20 | 1.03 (0.92–1.14) | 0.656 | 0.31 | 1.03 (0.92–1.15) | 0.575 | 0.48 | 1.04 (0.93–1.17) | 0.487 |
| ε3/ε3 | Entorhinal/inf. temporal | 0.89 | 1.04 (0.96–1.11) | 0.347 | 2.84 | 1.07 (0.99–1.16) | 0.092 | 2.46 | 1.07 (0.98–1.15) | 0.117 |
| ε3/ε3 | Neocortex | 1.40 | 1.06 (0.96–1.16) | 0.238 | 2.28 | 1.08 (0.98–1.19) | 0.131 | 1.98 | 1.07 (0.97–1.19) | 0.159 |
| ε3/ε4 | Spinal cord | — | — | — | — | — | — | — | — | — |
| ε3/ε4 | Amygdala | 0.29 | 0.98 (0.91–1.06) | 0.589 | 0.84 | 0.96 (0.89–1.04) | 0.360 | 0.91 | 0.96 (0.89–1.04) | 0.340 |
| ε3/ε4 | Hippocampus | 1.72 | 1.06 (0.97–1.14) | 0.190 | 1.69 | 1.06 (0.97–1.15) | 0.193 | 2.10 | 1.06 (0.98–1.16) | 0.147 |
| ε3/ε4 | Entorhinal/inf. temporal | 0.44 | 1.02 (0.96–1.08) | 0.510 | 0.28 | 1.02 (0.96–1.08) | 0.598 | 0.14 | 1.01 (0.95–1.07) | 0.709 |
| **ε3/ε4** | **Neocortex** | **10.27** | **1.14 (1.05–1.23)** | **0.001** | **16.08** | **1.19 (1.09–1.30)** | **<0.001** | **15.94** | **1.19 (1.09–1.30)** | **<0.001** |
| ε4/ε4 | Spinal cord | — | — | — | — | — | — | — | — | — |
| ε4/ε4 | Amygdala | 0.14 | 0.98 (0.86–1.11) | 0.712 | 0.80 | 0.94 (0.82–1.08) | 0.370 | 0.92 | 0.94 (0.81–1.07) | 0.337 |
| ε4/ε4 | Hippocampus | 0.49 | 1.05 (0.91–1.21) | 0.483 | 0.55 | 1.06 (0.91–1.23) | 0.460 | 0.47 | 1.05 (0.91–1.22) | 0.495 |
| ε4/ε4 | Entorhinal/inf. temporal | 1.75 | 1.07 (0.97–1.20) | 0.185 | 1.75 | 1.08 (0.97–1.21) | 0.186 | 2.04 | 1.09 (0.97–1.22) | 0.153 |
| ε4/ε4 | Neocortex | 0.03 | 0.99 (0.85–1.14) | 0.868 | 0.07 | 1.02 (0.87–1.19) | 0.799 | 0.05 | 1.02 (0.87–1.19) | 0.829 |

*Bold rows indicate statistically significant associations (p < 0.05) in ADNC-adjusted models.*

*Adjusted models include sex, education, and age at dementia onset; ADNC-adjusted models additionally include ADNC.*

*Abbreviations: ADNC, Alzheimer's disease neuropathologic change; APOE, apolipoprotein E; CI, confidence interval; inf., inferior; LB, Lewy body; OB, olfactory bulb; OR, odds ratio; TAR DNA-binding protein 43; yr, years.*

**Supplementary Table 7. Severity distribution of cerebral amyloid angiopathy (A), arteriolosclerosis (B) and Circle of Willis atherosclerosis (C) by *APOE* haplotype.**

| **Supplementary Table 7A** | | | | | | | | | | | | |
| --- | --- | --- | --- | --- | --- | --- | --- | --- | --- | --- | --- | --- |
| ***APOE* haplotype** | **CAA severity** | **Comparison**  **n (%)** | **Reference**  **n (%)** | **χ²** | **Unadjusted OR**  **(95% CI)** | **p** | **Adjusted LRχ²** | **Adjusted OR**  **(95% CI)** | **p** | **ADNC-Adjusted LRχ²** | **ADNC-adjusted OR**  **(95% CI)** | **p** |
| ε2/εX | None | 30 (26.5%) | 310 (27.9%) | 0.09 | 0.94 (0.58–1.47) | 0.764 | 0.12 | 0.93 (0.59–1.42) | 0.726 | 0.66 | 0.79 (0.44–1.37) | 0.417 |
| ε2/εX | Mild | 38 (33.6%) | 416 (37.4%) | 0.63 | 0.85 (0.55–1.30) | 0.428 | 0.62 | 0.85 (0.56–1.27) | 0.431 | 0.27 | 0.88 (0.55–1.40) | 0.601 |
| ε2/εX | Moderate | 33 (29.2%) | 235 (21.1%) | 3.91 | 1.54 (0.97–2.40) | 0.048 | 3.82 | 1.55 (1.00–2.37) | 0.051 | 2.74 | 1.56 (0.92–2.57) | 0.098 |
| ε2/εX | Severe | 12 (10.6%) | 151 (13.6%) | 0.78 | 0.76 (0.37–1.42) | 0.377 | 0.81 | 0.76 (0.39–1.36) | 0.369 | 0.10 | 0.89 (0.42–1.73) | 0.752 |
| **ε3/ε4** | **None** | **219 (15.4%)** | **310 (27.9%)** | **58.54** | **0.47 (0.39–0.58)** | **<0.001** | **55.04** | **0.48 (0.39–0.58)** | **<0.001** | **16.27** | **0.58 (0.44–0.76)** | **<0.001** |
| ε3/ε4 | Mild | 565 (39.8%) | 416 (37.4%) | 1.49 | 1.11 (0.94–1.30) | 0.223 | 1.03 | 1.09 (0.93–1.28) | 0.309 | 0.87 | 0.91 (0.74–1.11) | 0.350 |
| **ε3/ε4** | **Moderate** | **430 (30.3%)** | **235 (21.1%)** | **26.95** | **1.62 (1.35–1.96)** | **<0.001** | **26.72** | **1.62 (1.35–1.94)** | **<0.001** | **19.77** | **1.69 (1.34–2.15)** | **<0.001** |
| ε3/ε4 | Severe | 206 (14.5%) | 151 (13.6%) | 0.44 | 1.08 (0.86–1.36) | 0.506 | 0.67 | 1.10 (0.88–1.38) | 0.414 | 0.03 | 1.03 (0.77–1.37) | 0.863 |
| **ε4/ε4** | **None** | **37 (8.1%)** | **310 (27.9%)** | **73.30** | **0.23 (0.16–0.33)** | **<0.001** | **75.32** | **0.24 (0.16–0.34)** | **<0.001** | **56.51** | **0.13 (0.07–0.25)** | **<0.001** |
| **ε4/ε4** | **Mild** | **92 (20.2%)** | **416 (37.4%)** | **43.86** | **0.42 (0.32–0.55)** | **<0.001** | **49.84** | **0.40 (0.31–0.52)** | **<0.001** | **45.89** | **0.34 (0.25–0.47)** | **<0.001** |
| **ε4/ε4** | **Moderate** | **166 (36.4%)** | **235 (21.1%)** | **39.62** | **2.14 (1.67–2.73)** | **<0.001** | **36.74** | **2.14 (1.68–2.74)** | **<0.001** | **27.78** | **2.33 (1.70–3.19)** | **<0.001** |
| **ε4/ε4** | **Severe** | **161 (35.3%)** | **151 (13.6%)** | **95.79** | **3.47 (2.66–4.53)** | **<0.001** | **86.62** | **3.52 (2.70–4.59)** | **<0.001** | **60.15** | **3.72 (2.67–5.21)** | **<0.001** |
| **Supplementary Table 7B** | | | | | | | | | | | | |
| ***APOE* haplotype** | **Arteriolosclerosis severity** | **Comparison**  **n (%)** | **Reference**  **n (%)** | **χ²** | **Unadjusted OR**  **(95% CI)** | **p** | **Adjusted LRχ²** | **Adjusted OR**  **(95% CI)** | **p** | **ADNC-Adjusted LRχ²** | **ADNC-adjusted OR**  **(95% CI)** | **p** |
| ε2/εX | None | 18 (17.0%) | 173 (16.8%) | 0.00 | 1.01 (0.56–1.75) | 0.965 | 0.00 | 1.02 (0.58–1.70) | 0.953 | 0.01 | 0.97 (0.47–1.86) | 0.935 |
| ε2/εX | Mild | 36 (34.0%) | 383 (37.2%) | 0.44 | 0.87 (0.55–1.34) | 0.508 | 0.40 | 0.87 (0.57–1.33) | 0.527 | 0.07 | 0.93 (0.56–1.52) | 0.785 |
| ε2/εX | Moderate | 40 (37.7%) | 332 (32.3%) | 1.31 | 1.27 (0.82–1.96) | 0.253 | 1.25 | 1.27 (0.83–1.93) | 0.265 | 0.97 | 1.28 (0.78–2.06) | 0.325 |
| ε2/εX | Severe | 12 (11.3%) | 141 (13.7%) | 0.47 | 0.80 (0.39–1.52) | 0.494 | 0.50 | 0.80 (0.41–1.45) | 0.480 | 0.50 | 0.78 (0.36–1.53) | 0.478 |
| ε3/ε4 | None | 217 (16.2%) | 173 (16.8%) | 0.14 | 0.96 (0.77–1.20) | 0.711 | 0.74 | 0.91 (0.73–1.13) | 0.389 | 0.04 | 0.97 (0.72–1.31) | 0.833 |
| ε3/ε4 | Mild | 479 (35.9%) | 383 (37.2%) | 0.47 | 0.94 (0.79–1.12) | 0.493 | 0.90 | 0.92 (0.78–1.09) | 0.344 | 0.19 | 0.95 (0.77–1.18) | 0.664 |
| ε3/ε4 | Moderate | 440 (32.9%) | 332 (32.3%) | 0.12 | 1.03 (0.86–1.23) | 0.731 | 0.58 | 1.07 (0.90–1.28) | 0.448 | 0.01 | 0.99 (0.80–1.23) | 0.925 |
| ε3/ε4 | Severe | 200 (15.0%) | 141 (13.7%) | 0.76 | 1.11 (0.87–1.41) | 0.384 | 2.77 | 1.22 (0.97–1.55) | 0.096 | 1.85 | 1.23 (0.91–1.65) | 0.174 |
| ε4/ε4 | None | 64 (15.1%) | 173 (16.8%) | 0.62 | 0.88 (0.64–1.22) | 0.431 | 2.57 | 0.77 (0.56–1.06) | 0.109 | 0.77 | 0.83 (0.54–1.26) | 0.380 |
| ε4/ε4 | Mild | 136 (32.2%) | 383 (37.2%) | 3.35 | 0.80 (0.62–1.02) | 0.067 | 6.73 | 0.72 (0.57–0.92) | 0.010 | 3.51 | 0.75 (0.55–1.01) | 0.061 |
| ε4/ε4 | Moderate | 147 (34.8%) | 332 (32.3%) | 0.84 | 1.12 (0.87–1.43) | 0.360 | 2.92 | 1.24 (0.97–1.59) | 0.087 | 0.99 | 1.17 (0.86–1.59) | 0.320 |
| **ε4/ε4** | **Severe** | **76 (18.0%)** | **141 (13.7%)** | **4.29** | **1.38 (1.00–1.89)** | **0.038** | **11.05** | **1.75 (1.26–2.41)** | **<0.001** | **6.14** | **1.69 (1.12–2.55)** | **0.013** |
| **Supplementary Table 7C** | | | | | | | | | | | | |
| ***APOE* haplotype** | **Atherosclerosis severity** | **Comparison**  **n (%)** | **Reference**  **n (%)** | **χ²** | **Unadjusted OR**  **(95% CI)** | **p** | **Adjusted LRχ²** | **Adjusted OR**  **(95% CI)** | **p** | **ADNC-Adjusted LRχ²** | **ADNC-adjusted OR**  **(95% CI)** | **p** |
| ε2/εX | None | 20 (17.9%) | 221 (19.8%) | 0.25 | 0.88 (0.50–1.48) | 0.618 | 0.14 | 0.90 (0.52–1.50) | 0.705 | 0.04 | 1.06 (0.58–1.87) | 0.852 |
| ε2/εX | Mild | 40 (35.7%) | 411 (36.9%) | 0.06 | 0.95 (0.62–1.45) | 0.810 | 0.06 | 0.95 (0.63–1.42) | 0.801 | 0.88 | 0.80 (0.49–1.28) | 0.347 |
| ε2/εX | Moderate | 39 (34.8%) | 328 (29.4%) | 1.42 | 1.28 (0.83–1.96) | 0.234 | 1.31 | 1.28 (0.84–1.93) | 0.252 | 3.31 | 1.58 (0.96–2.54) | 0.069 |
| ε2/εX | Severe | 13 (11.6%) | 155 (13.9%) | 0.45 | 0.81 (0.41–1.50) | 0.501 | 0.53 | 0.80 (0.42–1.43) | 0.469 | 1.47 | 0.63 (0.27–1.30) | 0.226 |
| ε3/ε4 | None | 285 (20.1%) | 221 (19.8%) | 0.04 | 1.02 (0.84–1.25) | 0.841 | 0.26 | 0.95 (0.77–1.17) | 0.609 | 0.02 | 1.02 (0.79–1.31) | 0.902 |
| ε3/ε4 | Mild | 562 (39.7%) | 411 (36.9%) | 2.15 | 1.13 (0.96–1.33) | 0.143 | 1.70 | 1.11 (0.95–1.31) | 0.192 | 1.00 | 1.11 (0.90–1.37) | 0.318 |
| ε3/ε4 | Moderate | 390 (27.6%) | 328 (29.4%) | 1.06 | 0.91 (0.76–1.09) | 0.304 | 0.00 | 1.00 (0.83–1.19) | 0.957 | 0.17 | 0.95 (0.75–1.20) | 0.676 |
| ε3/ε4 | Severe | 178 (12.6%) | 155 (13.9%) | 0.95 | 0.89 (0.70–1.13) | 0.329 | 0.00 | 1.00 (0.79–1.27) | 0.999 | 0.00 | 1.00 (0.74–1.35) | 0.973 |
| ε4/ε4 | None | 95 (20.8%) | 221 (19.8%) | 0.19 | 1.06 (0.80–1.40) | 0.664 | 2.10 | 0.81 (0.61–1.08) | 0.147 | 3.58 | 0.71 (0.49–1.01) | 0.059 |
| **ε4/ε4** | **Mild** | **198 (43.3%)** | **411 (36.9%)** | **5.71** | **1.31 (1.04–1.64)** | **0.017** | **4.30** | **1.27 (1.01–1.59)** | **0.038** | **4.79** | **1.38 (1.03–1.84)** | **0.029** |
| ε4/ε4 | Moderate | 115 (25.2%) | 328 (29.4%) | 2.90 | 0.81 (0.62–1.04) | 0.089 | 0.06 | 0.97 (0.75–1.25) | 0.814 | 0.02 | 0.98 (0.70–1.37) | 0.892 |
| ε4/ε4 | Severe | 49 (10.7%) | 155 (13.9%) | 2.90 | 0.74 (0.52–1.06) | 0.089 | 0.17 | 1.08 (0.75–1.55) | 0.680 | 0.13 | 1.09 (0.68–1.71) | 0.718 |

*Reference group: ε3/ε3 carriers.*

*Bold rows indicate statistically significant associations (p < 0.05) in ADNC-adjusted models.*

*Adjusted models include sex, education, and age at death; ADNC-adjusted models additionally include ADNC.*

*Abbreviations: ADNC, Alzheimer's disease neuropathologic change; APOE, apolipoprotein E; CAA, cerebral amyloid angiopathy; CI, confidence interval; OR, odds ratio.*

**Supplementary Table 8.** **Severity-specific associations between age and cerebral amyloid angiopathy (A), arteriolosclerosis (B) and Circle of Willis atherosclerosis (C) by *APOE* haplotype.**

| **Supplementary Table 8A** | | | | | | | | | | |
| --- | --- | --- | --- | --- | --- | --- | --- | --- | --- | --- |
| ***APOE* haplotype** | **CAA severity** | **χ²** | **Unadjusted OR/10 yr**  **(95% CI)** | **p** | **Adjusted LRχ²** | **Adjusted OR/10 yr**  **(95% CI)** | **p** | **ADNC-Adjusted LRχ²** | **ADNC-adjusted OR/10 yr**  **(95% CI)** | **p** |
| **ε2/εX** | **None** | **5.77** | **1.66 (1.07–2.59)** | **0.016** | **5.48** | **1.65 (1.06–2.58)** | **0.019** | **7.42** | **2.51 (1.20–5.24)** | **0.006** |
| ε2/εX | Mild | 0.13 | 0.94 (0.66–1.34) | 0.718 | 0.04 | 0.96 (0.67–1.38) | 0.833 | 1.55 | 0.74 (0.46–1.19) | 0.213 |
| ε2/εX | Moderate | 2.41 | 0.75 (0.52–1.08) | 0.120 | 2.36 | 0.75 (0.51–1.09) | 0.125 | 0.39 | 0.86 (0.53–1.39) | 0.534 |
| ε2/εX | Severe | 0.22 | 0.88 (0.52–1.51) | 0.643 | 0.32 | 0.84 (0.47–1.51) | 0.573 | 0.10 | 0.90 (0.46–1.77) | 0.754 |
| ε3/ε3 | None | 3.82 | 1.13 (1.00–1.27) | 0.051 | 3.45 | 1.12 (0.99–1.26) | 0.063 | 0.00 | 1.00 (0.84–1.19) | 0.993 |
| ε3/ε3 | Mild | 0.59 | 0.96 (0.86–1.07) | 0.444 | 0.60 | 0.96 (0.86–1.07) | 0.440 | 0.04 | 1.01 (0.88–1.17) | 0.851 |
| ε3/ε3 | Moderate | 0.85 | 0.94 (0.83–1.07) | 0.358 | 0.68 | 0.95 (0.83–1.08) | 0.408 | 2.30 | 0.88 (0.74–1.04) | 0.129 |
| ε3/ε3 | Severe | 0.13 | 0.97 (0.84–1.13) | 0.719 | 0.12 | 0.97 (0.84–1.14) | 0.731 | 2.10 | 1.16 (0.95–1.42) | 0.147 |
| ε3/ε4 | None | 0.82 | 1.07 (0.92–1.25) | 0.365 | 1.19 | 1.09 (0.93–1.27) | 0.276 | 1.53 | 1.14 (0.92–1.42) | 0.216 |
| **ε3/ε4** | **Mild** | **5.84** | **0.87 (0.78–0.98)** | **0.016** | **6.93** | **0.86 (0.77–0.96)** | **0.008** | **4.40** | **0.86 (0.74–0.99)** | **0.036** |
| ε3/ε4 | Moderate | 0.00 | 1.00 (0.89–1.13) | 0.965 | 0.00 | 1.00 (0.88–1.12) | 0.954 | 0.03 | 0.99 (0.85–1.15) | 0.870 |
| **ε3/ε4** | **Severe** | **5.82** | **1.22 (1.04–1.43)** | **0.016** | **7.11** | **1.25 (1.06–1.47)** | **0.008** | **3.97** | **1.23 (1.00–1.52)** | **0.046** |
| ε4/ε4 | None | 0.02 | 0.97 (0.65–1.44) | 0.887 | 0.05 | 0.96 (0.64–1.42) | 0.825 | 0.26 | 0.80 (0.34–1.90) | 0.612 |
| **ε4/ε4** | **Mild** | **12.15** | **0.62 (0.47–0.81)** | **<0.001** | **12.44** | **0.61 (0.46–0.81)** | **<0.001** | **9.41** | **0.59 (0.41–0.83)** | **0.002** |
| **ε4/ε4** | **Moderate** | **3.41** | **1.24 (0.99–1.56)** | **0.065** | **3.10** | **1.23 (0.98–1.54)** | **0.078** | **3.88** | **1.33 (1.00–1.77)** | **0.049** |
| ε4/ε4 | Severe | 1.32 | 1.14 (0.91–1.44) | 0.250 | 1.77 | 1.17 (0.93–1.47) | 0.184 | 0.53 | 1.11 (0.84–1.47) | 0.466 |
| **Supplementary Table 8B** | | | | | | | | | | |
| ***APOE***  **haplotype** | **Arteriolosclerosis severity** | **χ²** | **Unadjusted OR/10 yr**  **(95% CI)** | **p** | **Adjusted LRχ²** | **Adjusted OR/10 yr**  **(95% CI)** | **p** | **ADNC-Adjusted LRχ²** | **ADNC-adjusted OR/10 yr**  **(95% CI)** | **p** |
| ε2/εX | None | 0.06 | 1.06 (0.67–1.73) | 0.800 | 0.19 | 1.11 (0.69–1.86) | 0.667 | 0.00 | 0.98 (0.49–2.04) | 0.965 |
| ε2/εX | Mild | 3.53 | 0.70 (0.48–1.02) | 0.060 | 2.02 | 0.76 (0.51–1.11) | 0.155 | 3.38 | 0.62 (0.36–1.03) | 0.066 |
| ε2/εX | Moderate | 2.03 | 1.31 (0.91–1.93) | 0.154 | 1.11 | 1.23 (0.84–1.82) | 0.293 | 1.64 | 1.37 (0.85–2.26) | 0.200 |
| ε2/εX | Severe | 0.13 | 1.11 (0.64–2.01) | 0.721 | 0.04 | 1.06 (0.59–2.05) | 0.851 | 0.79 | 1.41 (0.67–3.29) | 0.374 |
| **ε3/ε3** | **None** | **18.57** | **0.73 (0.63–0.84)** | **<0.001** | **18.73** | **0.73 (0.63–0.84)** | **<0.001** | **17.46** | **0.64 (0.52–0.79)** | **<0.001** |
| **ε3/ε3** | **Mild** | **10.75** | **0.83 (0.74–0.93)** | **0.001** | **8.51** | **0.84 (0.75–0.95)** | **0.004** | **9.21** | **0.79 (0.68–0.92)** | **0.002** |
| **ε3/ε3** | **Moderate** | **11.83** | **1.23 (1.09–1.40)** | **<0.001** | **9.23** | **1.21 (1.07–1.37)** | **0.002** | **14.02** | **1.35 (1.15–1.59)** | **<0.001** |
| **ε3/ε3** | **Severe** | **24.51** | **1.55 (1.30–1.88)** | **<0.001** | **25.34** | **1.58 (1.32–1.93)** | **<0.001** | **13.14** | **1.53 (1.21–1.96)** | **<0.001** |
| **ε3/ε4** | **None** | **40.44** | **0.62 (0.54–0.72)** | **<0.001** | **35.95** | **0.64 (0.55–0.74)** | **<0.001** | **20.52** | **0.63 (0.51–0.77)** | **<0.001** |
| **ε3/ε4** | **Mild** | **3.72** | **0.89 (0.80–1.00)** | **0.054** | **2.95** | **0.90 (0.80–1.02)** | **0.086** | **5.19** | **0.84 (0.72–0.98)** | **0.023** |
| **ε3/ε4** | **Moderate** | **11.15** | **1.23 (1.09–1.39)** | **<0.001** | **9.83** | **1.22 (1.08–1.38)** | **0.002** | **6.98** | **1.23 (1.06–1.44)** | **0.008** |
| **ε3/ε4** | **Severe** | **26.00** | **1.54 (1.30–1.84)** | **<0.001** | **21.60** | **1.49 (1.26–1.78)** | **<0.001** | **16.81** | **1.55 (1.25–1.95)** | **<0.001** |
| ε4/ε4 | None | 1.75 | 0.81 (0.59–1.11) | 0.186 | 1.71 | 0.81 (0.59–1.11) | 0.191 | 2.39 | 0.72 (0.47–1.09) | 0.122 |
| ε4/ε4 | Mild | 4.84 | 0.76 (0.60–0.97) | 0.028 | 5.00 | 0.76 (0.60–0.97) | 0.025 | 2.23 | 0.80 (0.59–1.07) | 0.135 |
| ε4/ε4 | Moderate | 2.05 | 1.19 (0.94–1.51) | 0.152 | 2.17 | 1.20 (0.94–1.52) | 0.140 | 0.92 | 1.15 (0.86–1.55) | 0.337 |
| **ε4/ε4** | **Severe** | **4.62** | **1.38 (1.03–1.88)** | **0.032** | **4.51** | **1.39 (1.03–1.89)** | **0.034** | **3.97** | **1.46 (1.01–2.13)** | **0.046** |
| **Supplementary Table 8C** | | | | | | | | | | |
| ***APOE***  **haplotype** | **Atherosclerosis severity** | **χ²** | **Unadjusted OR/10 yr**  **(95% CI)** | **p** | **Adjusted LRχ²** | **Adjusted OR/10 yr**  **(95% CI)** | **p** | **ADNC-Adjusted LRχ²** | **ADNC-adjusted OR/10 yr**  **(95% CI)** | **p** |
| ε2/εX | None | 3.17 | 0.67 (0.43–1.04) | 0.075 | 2.36 | 0.70 (0.44–1.11) | 0.124 | 2.24 | 0.64 (0.34–1.15) | 0.135 |
| ε2/εX | Mild | 3.10 | 0.73 (0.50–1.04) | 0.078 | 2.56 | 0.73 (0.49–1.07) | 0.110 | 2.95 | 0.64 (0.37–1.06) | 0.086 |
| ε2/εX | Moderate | 5.74 | 1.59 (1.09–2.43) | 0.017 | 5.76 | 1.61 (1.09–2.47) | 0.016 | 3.02 | 1.54 (0.95–2.62) | 0.082 |
| ε2/εX | Severe | 1.86 | 1.49 (0.85–2.88) | 0.173 | 2.18 | 1.60 (0.87–3.35) | 0.140 | 3.45 | 2.23 (0.96–6.48) | 0.063 |
| **ε3/ε3** | **None** | **97.14** | **0.52 (0.45–0.59)** | **<0.001** | **98.37** | **0.51 (0.45–0.59)** | **<0.001** | **57.78** | **0.51 (0.43–0.61)** | **<0.001** |
| ε3/ε3 | Mild | 0.98 | 0.95 (0.85–1.06) | 0.321 | 0.85 | 0.95 (0.85–1.06) | 0.356 | 0.37 | 0.96 (0.83–1.11) | 0.545 |
| **ε3/ε3** | **Moderate** | **26.87** | **1.38 (1.22–1.56)** | **<0.001** | **27.47** | **1.39 (1.22–1.58)** | **<0.001** | **13.55** | **1.36 (1.15–1.61)** | **<0.001** |
| **ε3/ε3** | **Severe** | **43.20** | **1.78 (1.48–2.16)** | **<0.001** | **42.26** | **1.79 (1.49–2.19)** | **<0.001** | **31.31** | **1.92 (1.51–2.48)** | **<0.001** |
| **ε3/ε4** | **None** | **109.81** | **0.49 (0.42–0.56)** | **<0.001** | **106.66** | **0.49 (0.42–0.56)** | **<0.001** | **67.69** | **0.48 (0.40–0.58)** | **<0.001** |
| ε3/ε4 | Mild | 4.15 | 0.89 (0.80–1.00) | 0.042 | 3.38 | 0.90 (0.81–1.01) | 0.066 | 1.05 | 0.93 (0.80–1.07) | 0.306 |
| **ε3/ε4** | **Moderate** | **69.07** | **1.75 (1.52–2.02)** | **<0.001** | **65.98** | **1.74 (1.51–2.01)** | **<0.001** | **30.07** | **1.64 (1.37–1.98)** | **<0.001** |
| **ε3/ε4** | **Severe** | **27.38** | **1.61 (1.34–1.94)** | **<0.001** | **25.05** | **1.58 (1.32–1.92)** | **<0.001** | **25.21** | **1.81 (1.43–2.33)** | **<0.001** |
| **ε4/ε4** | **None** | **48.06** | **0.37 (0.27–0.49)** | **<0.001** | **47.32** | **0.37 (0.27–0.50)** | **<0.001** | **33.57** | **0.33 (0.22–0.49)** | **<0.001** |
| ε4/ε4 | Mild | 0.71 | 0.91 (0.73–1.13) | 0.400 | 0.70 | 0.91 (0.73–1.13) | 0.403 | 0.45 | 0.91 (0.69–1.20) | 0.505 |
| **ε4/ε4** | **Moderate** | **16.91** | **1.72 (1.32–2.26)** | **<0.001** | **16.66** | **1.72 (1.32–2.26)** | **<0.001** | **10.52** | **1.74 (1.24–2.48)** | **0.001** |
| **ε4/ε4** | **Severe** | **22.38** | **2.48 (1.68–3.75)** | **<0.001** | **21.56** | **2.43 (1.65–3.68)** | **<0.001** | **16.13** | **2.55 (1.59–4.22)** | **<0.001** |

*Bold rows indicate statistically significant associations (p < 0.05) in ADNC-adjusted models.*

*Adjusted models include sex and education; ADNC-adjusted models additionally include ADNC.*

*Abbreviations: ADNC, Alzheimer's disease neuropathologic change; APOE, apolipoprotein E; CAA, cerebral amyloid angiopathy; CI, confidence interval; OR, odds ratio; yr, years.*

**Supplementary Table 9**. **Severity-specific associations between dementia duration and cerebral amyloid angiopathy (A), arteriolosclerosis (B) and Circle of Willis atherosclerosis (C) by *APOE* haplotype.**

| **Supplementary Table 9A** | | | | | | | | | | |
| --- | --- | --- | --- | --- | --- | --- | --- | --- | --- | --- |
| ***APOE* haplotype** | **CAA severity** | **χ²** | **Unadjusted OR/yr (95% CI)** | **p** | **Adjusted LRχ²** | **Adjusted OR/yr (95% CI)** | **p** | **ADNC-Adjusted LRχ²** | **ADNC-adjusted OR/yr (95% CI)** | **p** |
| ε2/εX | None | 1.64 | 0.91 (0.79–1.06) | 0.200 | 0.14 | 0.97 (0.83–1.13) | 0.707 | 0.85 | 1.10 (0.90–1.33) | 0.357 |
| ε2/εX | Mild | 0.05 | 1.02 (0.90–1.15) | 0.817 | 0.03 | 1.01 (0.89–1.16) | 0.860 | 0.17 | 0.97 (0.84–1.12) | 0.677 |
| ε2/εX | Moderate | 0.14 | 0.98 (0.86–1.11) | 0.711 | 0.84 | 0.94 (0.81–1.08) | 0.359 | 1.96 | 0.89 (0.74–1.06) | 0.162 |
| ε2/εX | Severe | 3.53 | 1.18 (1.00–1.40) | 0.060 | 3.37 | 1.21 (0.99–1.48) | 0.066 | 3.01 | 1.21 (0.98–1.49) | 0.083 |
| **ε3/ε3** | **None** | **16.18** | **0.91 (0.87–0.95)** | **<0.001** | **11.82** | **0.92 (0.88–0.97)** | **<0.001** | **5.50** | **0.93 (0.87–0.99)** | **0.019** |
| ε3/ε3 | Mild | 0.16 | 1.01 (0.97–1.05) | 0.692 | 0.03 | 1.00 (0.96–1.05) | 0.875 | 0.95 | 0.98 (0.93–1.03) | 0.330 |
| **ε3/ε3** | **Moderate** | **7.31** | **1.07 (1.02–1.12)** | **0.007** | **6.09** | **1.07 (1.01–1.12)** | **0.014** | **6.61** | **1.09 (1.02–1.16)** | **0.010** |
| ε3/ε3 | Severe | 1.80 | 1.04 (0.98–1.10) | 0.180 | 1.52 | 1.04 (0.98–1.10) | 0.218 | 1.45 | 1.05 (0.97–1.13) | 0.228 |
| ε3/ε4 | None | 9.18 | 0.93 (0.89–0.98) | 0.002 | 6.24 | 0.94 (0.89–0.99) | 0.012 | 1.63 | 0.96 (0.90–1.02) | 0.202 |
| ε3/ε4 | Mild | 0.01 | 1.00 (0.97–1.04) | 0.913 | 0.43 | 0.99 (0.96–1.02) | 0.514 | 3.03 | 0.96 (0.92–1.01) | 0.082 |
| ε3/ε4 | Moderate | 2.08 | 1.03 (0.99–1.06) | 0.149 | 1.63 | 1.02 (0.99–1.06) | 0.202 | 3.48 | 1.05 (1.00–1.09) | 0.062 |
| ε3/ε4 | Severe | 1.01 | 1.02 (0.98–1.07) | 0.316 | 3.26 | 1.05 (1.00–1.10) | 0.071 | 1.63 | 1.04 (0.98–1.10) | 0.202 |
| ε4/ε4 | None | 2.88 | 0.91 (0.81–1.02) | 0.090 | 3.21 | 0.90 (0.80–1.01) | 0.073 | 0.16 | 1.04 (0.85–1.28) | 0.685 |
| ε4/ε4 | Mild | 3.74 | 1.07 (1.00–1.15) | 0.053 | 0.70 | 1.03 (0.96–1.11) | 0.402 | 0.29 | 1.03 (0.94–1.12) | 0.593 |
| ε4/ε4 | Moderate | 1.24 | 1.03 (0.98–1.10) | 0.266 | 1.89 | 1.05 (0.98–1.11) | 0.169 | 2.96 | 1.07 (0.99–1.16) | 0.086 |
| **ε4/ε4** | **Severe** | **3.37** | **0.94 (0.89–1.01)** | **0.067** | **1.21** | **0.96 (0.90–1.03)** | **0.271** | **5.78** | **0.91 (0.84–0.98)** | **0.016** |
| **Supplementary Table 9B** | | | | | | | | | | |
| ***APOE* haplotype** | **Arteriosclerosis severity** | **χ²** | **Unadjusted OR/yr (95% CI)** | **p** | **Adjusted LRχ²** | **Adjusted OR/yr (95% CI)** | **p** | **ADNC-Adjusted LRχ²** | **ADNC-adjusted OR/yr (95% CI)** | **p** |
| ε2/εX | None | 0.03 | 0.99 (0.83–1.15) | 0.855 | 0.00 | 1.00 (0.83–1.18) | 0.990 | 0.00 | 1.00 (0.79–1.24) | 0.986 |
| ε2/εX | Mild | 0.01 | 1.00 (0.87–1.13) | 0.935 | 0.15 | 0.97 (0.84–1.12) | 0.699 | 0.33 | 0.95 (0.81–1.12) | 0.566 |
| ε2/εX | Moderate | 0.97 | 1.06 (0.94–1.20) | 0.326 | 1.37 | 1.08 (0.95–1.25) | 0.243 | 1.47 | 1.10 (0.94–1.29) | 0.225 |
| ε2/εX | Severe | 1.53 | 0.88 (0.68–1.07) | 0.216 | 1.36 | 0.86 (0.65–1.10) | 0.244 | 0.95 | 0.88 (0.65–1.13) | 0.329 |
| ε3/ε3 | None | 4.29 | 0.94 (0.89–1.00) | 0.038 | 11.04 | 0.90 (0.85–0.96) | <0.001 | 3.83 | 0.93 (0.85–1.00) | 0.050 |
| **ε3/ε3** | **Mild** | **4.97** | **0.95 (0.91–0.99)** | **0.026** | **7.64** | **0.94 (0.90–0.98)** | **0.006** | **8.72** | **0.92 (0.87–0.97)** | **0.003** |
| **ε3/ε3** | **Moderate** | **9.62** | **1.07 (1.03–1.12)** | **0.002** | **13.29** | **1.09 (1.04–1.14)** | **<0.001** | **10.36** | **1.10 (1.04–1.16)** | **0.001** |
| ε3/ε3 | Severe | 1.19 | 1.03 (0.97–1.09) | 0.276 | 7.44 | 1.09 (1.03–1.16) | 0.006 | 3.22 | 1.07 (0.99–1.15) | 0.073 |
| ε3/ε4 | None | 7.09 | 0.94 (0.90–0.98) | 0.008 | 10.10 | 0.92 (0.88–0.97) | 0.001 | 1.55 | 0.96 (0.90–1.02) | 0.213 |
| ε3/ε4 | Mild | 0.00 | 1.00 (0.97–1.03) | 0.970 | 0.01 | 1.00 (0.96–1.03) | 0.912 | 0.36 | 1.01 (0.97–1.06) | 0.550 |
| ε3/ε4 | Moderate | 1.22 | 1.02 (0.99–1.06) | 0.269 | 2.26 | 1.03 (0.99–1.07) | 0.133 | 0.17 | 1.01 (0.97–1.06) | 0.683 |
| ε3/ε4 | Severe | 1.67 | 1.03 (0.98–1.08) | 0.197 | 3.07 | 1.04 (1.00–1.09) | 0.080 | 0.00 | 1.00 (0.94–1.06) | 0.963 |
| ε4/ε4 | None | 1.30 | 0.95 (0.87–1.04) | 0.254 | 2.03 | 0.94 (0.85–1.02) | 0.154 | 0.25 | 0.97 (0.86–1.09) | 0.618 |
| ε4/ε4 | Mild | 0.19 | 1.01 (0.95–1.08) | 0.663 | 0.08 | 0.99 (0.93–1.06) | 0.773 | 0.02 | 0.99 (0.92–1.08) | 0.889 |
| ε4/ε4 | Moderate | 0.47 | 1.02 (0.96–1.09) | 0.491 | 1.19 | 1.04 (0.97–1.11) | 0.274 | 0.05 | 1.01 (0.93–1.09) | 0.825 |
| ε4/ε4 | Severe | 0.11 | 0.99 (0.91–1.07) | 0.737 | 0.14 | 1.02 (0.93–1.10) | 0.709 | 0.07 | 1.01 (0.92–1.12) | 0.788 |
| **Supplementary Table 9C** | | | | | | | | | | |
| ***APOE* haplotype** | **Atherosclerosis severity** | **χ²** | **Unadjusted OR/yr (95% CI)** | **p** | **Adjusted LRχ²** | **Adjusted OR/yr (95% CI)** | **p** | **ADNC-Adjusted LRχ²** | **ADNC-adjusted OR/yr (95% CI)** | **p** |
| ε2/εX | None | 0.00 | 1.00 (0.85–1.17) | 0.968 | 0.06 | 0.98 (0.81–1.17) | 0.812 | 1.20 | 0.89 (0.72–1.09) | 0.274 |
| ε2/εX | Mild | 0.45 | 1.05 (0.92–1.19) | 0.501 | 0.04 | 1.02 (0.87–1.18) | 0.848 | 1.17 | 1.10 (0.92–1.33) | 0.279 |
| ε2/εX | Moderate | 0.90 | 0.94 (0.82–1.07) | 0.344 | 0.00 | 1.00 (0.86–1.16) | 0.987 | 0.63 | 0.93 (0.78–1.10) | 0.428 |
| ε2/εX | Severe | 0.11 | 1.03 (0.85–1.24) | 0.741 | 1.00 | 1.12 (0.89–1.40) | 0.316 | 2.17 | 1.22 (0.94–1.64) | 0.141 |
| **ε3/ε3** | **None** | **0.00** | **1.00 (0.95–1.05)** | **0.949** | **7.21** | **0.93 (0.88–0.98)** | **0.007** | **12.14** | **0.89 (0.82–0.95)** | **<0.001** |
| ε3/ε3 | Mild | 0.07 | 1.01 (0.97–1.05) | 0.796 | 0.00 | 1.00 (0.96–1.04) | 0.995 | 0.01 | 1.00 (0.95–1.06) | 0.939 |
| ε3/ε3 | Moderate | 0.51 | 0.98 (0.94–1.03) | 0.473 | 0.77 | 1.02 (0.98–1.07) | 0.379 | 3.80 | 1.06 (1.00–1.12) | 0.051 |
| ε3/ε3 | Severe | 0.26 | 1.02 (0.96–1.07) | 0.613 | 6.42 | 1.08 (1.02–1.15) | 0.011 | 3.59 | 1.08 (1.00–1.16) | 0.058 |
| **ε3/ε4** | **None** | **3.90** | **0.96 (0.92–1.00)** | **0.048** | **12.83** | **0.92 (0.88–0.96)** | **<0.001** | **13.57** | **0.90 (0.85–0.95)** | **<0.001** |
| ε3/ε4 | Mild | 1.31 | 0.98 (0.95–1.01) | 0.252 | 1.58 | 0.98 (0.94–1.01) | 0.209 | 0.57 | 0.98 (0.94–1.03) | 0.451 |
| **ε3/ε4** | **Moderate** | **3.24** | **1.03 (1.00–1.07)** | **0.072** | **11.50** | **1.07 (1.03–1.11)** | **<0.001** | **11.16** | **1.09 (1.04–1.14)** | **<0.001** |
| ε3/ε4 | Severe | 2.55 | 1.04 (0.99–1.09) | 0.110 | 6.07 | 1.07 (1.01–1.12) | 0.014 | 3.16 | 1.06 (0.99–1.13) | 0.075 |
| **ε4/ε4** | **None** | **4.71** | **0.92 (0.85–0.99)** | **0.030** | **14.38** | **0.85 (0.78–0.93)** | **<0.001** | **9.59** | **0.85 (0.76–0.94)** | **0.002** |
| ε4/ε4 | Mild | 0.14 | 1.01 (0.95–1.07) | 0.705 | 0.01 | 1.00 (0.94–1.07) | 0.933 | 0.21 | 0.98 (0.91–1.06) | 0.651 |
| **ε4/ε4** | **Moderate** | **0.51** | **1.02 (0.96–1.09)** | **0.477** | **3.28** | **1.07 (1.00–1.15)** | **0.070** | **4.95** | **1.11 (1.01–1.21)** | **0.026** |
| ε4/ε4 | Severe | 1.37 | 1.06 (0.96–1.15) | 0.241 | 5.07 | 1.12 (1.02–1.23) | 0.024 | 2.39 | 1.10 (0.97–1.25) | 0.122 |

*Bold rows indicate statistically significant associations (p < 0.05) in ADNC-adjusted models.*

*Adjusted models include sex, education, and age at dementia onset; ADNC-adjusted models additionally include ADNC.*

*Abbreviations: ADNC, Alzheimer's disease neuropathologic change; APOE, apolipoprotein E; CAA, cerebral amyloid angiopathy; CI, confidence interval; OR, odds ratio; yr, year.*

**Supplementary Table 10**. **Sex differences in regional or severity distribution of copathologies by *APOE* haplotype in confirmed AD dementia.**

| **Pathology** | ***APOE* haplotype** | **N (M/F)** | **Distribution (Male%/Female%)** | **Test** | **p (unadjusted)** | **Adjusted OR (95% CI) M vs. F** | **p (adjusted)** |
| --- | --- | --- | --- | --- | --- | --- | --- |
| Lewy body | ε2/εX | 86 (40/46) | No LB: 60/65.2; Limbic/Amyg.: 20/19.6; Neocort.: 12.5/10.9 | Fisher | 0.967 | 1.70 (0.65–4.62) | 0.282 |
| Lewy body | ε3/ε3 | 688 (347/341) | No LB: 53.6/61; Limbic/Amyg.: 28/26.4; Neocort.: 13/8.8 | Fisher | 0.100 | 1.33 (0.98–1.81) | 0.072 |
| Lewy body | ε3/ε4 | 901 (433/468) | No LB: 45.3/50.6; Limbic/Amyg.: 31.2/30.6; Neocort.: 15.5/15 | χ²=8.4 | 0.079 | 1.08 (0.83–1.42) | 0.553 |
| Lewy body | ε4/ε4 | 289 (146/143) | No LB: 41.8/40.6; Limbic/Amyg.: 38.4/44.8; Neocort.: 15.8/12.6 | Fisher | 0.155 | 1.35 (0.69–2.68) | 0.379 |
| TDP-43 | ε2/εX | 37 (13/24) | None: 38.5/33.3; Spinal: 0/0; Amyg.: 7.7/4.2; Hippoc.: 7.7/20.8; Entorh.: 30.8/29.2; Neocort.: 15.4/12.5 | Fisher | 0.927 | 2.03 (0.37–13.68) | 0.429 |
| TDP-43 | ε3/ε3 | 294 (144/150) | None: 28.5/18; Spinal: 0/0; Amyg.: 11.8/10; Hippoc.: 9.7/14; Entorh.: 32.6/40.7; Neocort.: 17.4/17.3 | Fisher | 0.191 | 1.16 (0.59–2.26) | 0.669 |
| TDP-43 | ε3/ε4 | 440 (187/253) | None: 24.6/17.8; Spinal: 0.5/0.4; Amyg.: 13.9/16.2; Hippoc.: 12.3/13.4; Entorh.: 35.3/37.9; Neocort.: 13.4/14.2 | Fisher | 0.643 | 0.97 (0.54–1.72) | 0.923 |
| TDP-43 | ε4/ε4 | 138 (68/70) | None: 22.1/14.3; Spinal: 0/0; Amyg.: 16.2/22.9; Hippoc.: 14.7/12.9; Entorh.: 29.4/41.4; Neocort.: 17.6/8.6 | Fisher | 0.244 | 0.94 (0.46–1.91) | 0.868 |
| CAA | ε2/εX | 86 (40/46) | None: 20/23.9; Mild: 45/32.6; Moderate: 22.5/32.6; Severe: 12.5/10.9 | χ²=1.8 | 0.607 | 0.69 (0.26–1.79) | 0.443 |
| CAA | ε3/ε3 | 689 (348/341) | None: 20.4/25.2; Mild: 42.8/43.1; Moderate: 22.4/18.2; Severe: 14.4/13.5 | χ²=3.4 | 0.338 | 1.30 (0.95–1.80) | 0.105 |
| CAA | ε3/ε4 | 903 (432/471) | None: 14.8/13; Mild: 40.3/42; Moderate: 29.2/31.6; Severe: 15.7/13.4 | χ²=2.1 | 0.561 | 1.04 (0.79–1.36) | 0.779 |
| **CAA** | **ε4/ε4** | **289 (146/143)** | **None: 0/7; Mild: 19.2/24.5; Moderate: 36.3/37.8; Severe: 44.5/30.8** | **Fisher** | **<0.001** | **1.78 (1.10–2.91)** | **0.021** |
| Arteriolosclerosis | ε2/εX | 82 (38/44) | None: 13.2/13.6; Mild: 44.7/25; Moderate: 28.9/50; Severe: 13.2/11.4 | χ²=4.6 | 0.201 | 1.11 (0.25–5.05) | 0.886 |
| Arteriolosclerosis | ε3/ε3 | 648 (324/324) | None: 13.6/14.5; Mild: 42/32.7; Moderate: 29.9/38.9; Severe: 14.5/13.9 | χ²=7.6 | 0.054 | 0.80 (0.58–1.11) | 0.175 |
| Arteriolosclerosis | ε3/ε4 | 863 (409/454) | None: 15.6/12.3; Mild: 40.3/33; Moderate: 32.8/34.8; Severe: 11.2/19.8 | χ²=15.2 | 0.002 | 0.76 (0.57–1.00) | 0.051 |
| Arteriolosclerosis | ε4/ε4 | 273 (138/135) | None: 14.5/11.9; Mild: 31.9/34.8; Moderate: 37/34.8; Severe: 16.7/18.5 | χ²=0.8 | 0.860 | 0.89 (0.47–1.69) | 0.722 |
| Atherosclerosis | ε2/εX | 85 (39/46) | None: 30.8/13; Mild: 20.5/43.5; Moderate: 38.5/34.8; Severe: 10.3/8.7 | Fisher | 0.079 | 1.61 (0.60–4.45) | 0.350 |
| Atherosclerosis | ε3/ε3 | 681 (344/337) | None: 21.8/21.1; Mild: 39/36.2; Moderate: 26.2/27.6; Severe: 13.1/15.1 | χ²=1.0 | 0.795 | 1.01 (0.73–1.40) | 0.930 |
| Atherosclerosis | ε3/ε4 | 887 (425/462) | None: 24.7/19.9; Mild: 42.4/37.2; Moderate: 22.6/27.1; Severe: 10.4/15.8 | χ²=10.5 | 0.015 | 0.79 (0.59–1.06) | 0.116 |
| Atherosclerosis | ε4/ε4 | 286 (142/144) | None: 23.9/16.7; Mild: 43.7/46.5; Moderate: 19.7/27.1; Severe: 12.7/9.7 | χ²=4.2 | 0.240 | 0.80 (0.47–1.35) | 0.411 |

*Adjusted models include age at death, education, and ADNC.*

*Bold rows indicate statistically significant associations (p < 0.05) in adjusted model.*

*Abbreviations: ADNC, Alzheimer's disease neuropathologic change; Amyg., Amygdala; APOE, apolipoprotein E; CAA, cerebral amyloid angiopathy; CI, confidence interval; Entorh., Entorhinal; F, female; Hippoc., Hippocampus; LB, Lewy body; M, male; Neocort., neocortical; OR, odds ratio; TDP-43, TAR DNA-binding protein 43.*

**Supplementary Table 11. *APOE* haplotype associations with TDP-43 pathology in all-cause dementia (A), AD dementia (B), and amyloid-positive AD dementia (C).**

| **Supplementary Table 11A. All-cause dementia** | | | | | | | | | | | |
| --- | --- | --- | --- | --- | --- | --- | --- | --- | --- | --- | --- |
| ***APOE* haplotype** | **Comparison n (%)** | **Reference n (%)** | **χ²** | **Unadjusted OR (95% CI)** | **p** | **Adjusted LRχ²** | **Adjusted OR (95% CI)** | **p** | **ADNC-Adjusted LRχ²** | **ADNC-adjusted OR (95% CI)** | **p** |
| ε2/εX | 88 (69.3%) | 477 (70.1%) | 0.037 | 0.960 (0.627 to 1.491) | 0.847 | 0.000 | 0.999 (0.656 to 1.542) | 0.995 | 0.003 | 0.987 (0.643 to 1.538) | 0.954 |
| ε3/ε4 | 465 (76.1%) | 477 (70.1%) | 5.791 | 1.355 (1.050 to 1.752) | 0.016 | 4.027 | 1.297 (1.006 to 1.675) | 0.045 | 3.604 | 1.305 (0.991 to 1.719) | 0.058 |
| ε4/ε4 | 130 (78.8%) | 477 (70.1%) | 4.900 | 1.580 (1.039 to 2.451) | 0.027 | 7.848 | 1.784 (1.186 to 2.743) | 0.005 | 5.768 | 1.721 (1.103 to 2.734) | 0.016 |
| **Supplementary Table 11B. AD dementia** | | | | | | | | | | | |
| ***APOE* haplotype** | **Comparison n (%)** | **Reference n (%)** | **χ²** | **Unadjusted OR (95% CI)** | **p** | **Adjusted LRχ²** | **Adjusted OR (95% CI)** | **p** | **ADNC-Adjusted LRχ²** | **ADNC-adjusted OR (95% CI)** | **p** |
| ε2/εX | 46 (67.6%) | 300 (73.5%) | 1.016 | 0.753 (0.421 to 1.379) | 0.313 | 1.452 | 0.699 (0.397 to 1.259) | 0.228 | 0.792 | 0.763 (0.426 to 1.396) | 0.374 |
| ε3/ε4 | 390 (79.9%) | 300 (73.5%) | 5.123 | 1.432 (1.036 to 1.982) | 0.024 | 7.310 | 1.563 (1.131 to 2.166) | 0.007 | 4.104 | 1.420 (1.011 to 1.995) | 0.043 |
| ε4/ε4 | 116 (80.6%) | 300 (73.5%) | 2.830 | 1.490 (0.918 to 2.476) | 0.093 | 8.434 | 2.047 (1.256 to 3.421) | 0.004 | 5.242 | 1.816 (1.088 to 3.104) | 0.022 |
| **Supplementary Table 11C. Amyloid dementia** | | | | | | | | | | | |
| ***APOE* haplotype** | **Comparison n (%)** | **Reference n (%)** | **χ²** | **Unadjusted OR (95% CI)** | **p** | **Adjusted LRχ²** | **Adjusted OR (95% CI)** | **p** | **ADNC-Adjusted LRχ²** | **ADNC-adjusted OR (95% CI)** | **p** |
| ε2/εX | 24 (64.9%) | 227 (76.4%) | 2.357 | 0.570 (0.263 to 1.288) | 0.125 | 3.227 | 0.478 (0.219 to 1.072) | 0.072 | 3.458 | 0.462 (0.210 to 1.044) | 0.063 |
| ε3/ε4 | 349 (79.3%) | 227 (76.4%) | 0.866 | 1.182 (0.816 to 1.709) | 0.352 | 1.279 | 1.238 (0.854 to 1.791) | 0.258 | 1.197 | 1.231 (0.847 to 1.785) | 0.274 |
| ε4/ε4 | 113 (81.9%) | 227 (76.4%) | 1.641 | 1.393 (0.819 to 2.425) | 0.200 | 6.614 | 2.011 (1.177 to 3.529) | 0.010 | 6.355 | 1.989 (1.162 to 3.497) | 0.012 |

*Reference group: ε3/ε3 carriers.*

*Adjusted models include sex, education, and age at death; ADNC-adjusted models additionally include ADNC.*

*Abbreviations: AD, Alzheimer's disease; ADNC, Alzheimer's disease neuropathologic change; APOE, apolipoprotein E; CI, confidence interval; OR, odds ratio.*
